# Supplementary material for: Water interaction with B-site (B = Al, Zr, Nb, and W) doped SrFeO3−δ-based perovskite surfaces for thermochemical water splitting applications
Source: Royal Society of Chemistry journal article supplement (doi:10.1039/d2cp03931a), 2022-01-01
Supplement: d2cp03931a1.pdf [file d2cp03931a1.pdf]

Electronic Supplementary Information

**Water Interaction with B-site (B = Al, Zr, Nb, and W) Doped SrFeO<sub>3-δ</sub>-  
Based Perovskite Surfaces for Thermochemical Water Splitting  
Applications<sup>†</sup>**

Sha Chen,<sup>a</sup> Hongwei Cheng,<sup>a,\*</sup> Yanbo Liu,<sup>a</sup> Xiaolu Xiong,<sup>a</sup> Qiangchao Sun,<sup>a</sup> Qian Xu,<sup>a</sup>  
Xionggang Lu,<sup>a,b,\*</sup> Shenggang Li,<sup>c,\*</sup>

<sup>a</sup> *State Key Laboratory of Advanced Special Steel & Shanghai Key Laboratory of  
Advances Ferrometallurgy & School of Materials Science and Engineering, Shanghai  
University, 99 Shangda Road, Shanghai 200444, P. R. China*

<sup>b</sup> *School of Materials Science, Shanghai Dianji University, 300 Shuihua Road, Shanghai  
200240, P. R. China*

<sup>c</sup> *CAS Key Laboratory of Low-Carbon Conversion Science and Engineering, Shanghai  
Advanced Research Institute, Chinese Academy of Sciences, 100 Haik Road, Shanghai  
201210, P. R. China*

\* Corresponding authors: Tel. & fax: +86-21-66136561. E-mail addresses: [hwcheng@shu.edu.cn](mailto:hwcheng@shu.edu.cn) (H.

Cheng); [luxg@shu.edu.cn](mailto:luxg@shu.edu.cn) (X. Lu); [lisg@sari.ac.cn](mailto:lisg@sari.ac.cn) (S. Li)

## List of Supplementary Figures and Tables

**Fig. S1** Side views of stable i1 (a), i2 (b), i3 (c), and i4 (d) types of pure SrFeO<sub>3</sub>. Atom colors: Sr – green, Fe – brown, O – red, H – white. All distances are given in Å.

**Fig. S2** Side views of stable i1 type of doped structures. Atom colors: Sr – green, Fe – brown, Al – silver, Zr – blue, Nb – purple, W – gray, O – red, H – white. All distances are given in Å.

**Fig. S3** Side views of stable i2 type of doped structures. Atom colors: Sr – green, Fe – brown, Al – silver, Zr – blue, Nb – purple, W – gray, O – red, H – white. All distances are given in Å.

**Fig. S4** Side views of stable i3 and i4 type of doped structures. Atom colors: Sr – green, Fe – brown, Al – silver, Zr – blue, Nb – purple, W – gray, O – red, H – white. All distances are given in Å.

**Fig. S5** Side views of stable i1v (a), i2v (b) and i4v (c) types of pure SrFeO<sub>3</sub>. Atom colors: Sr – green, Fe – brown, O – red, H – white. All distances are given in Å.

**Fig. S6** Side views of stable i1v type of doped structures. Atom colors: Sr – green, Fe – brown, Al – silver, Zr – blue, Nb – purple, W – gray, O – red, H – white. All distances are given in Å.

**Fig. S7** Side views of stable i2v<sup>F</sup> type of doped structures. Atom colors: Sr – green, Fe – brown, Al – silver, Zr – blue, Nb – purple, W – gray, O – red, H – white. All distances are given in Å.

**Fig. S8** Side views of the oxygen migration from surface V<sub>M</sub> site on the SrO termination to subsurface V<sub>S</sub> site in doped structures. Atom colors: Sr – green, Fe – brown, M (Al, Zr, Nb or W) – silver, O – red.

**Fig. S9** The optimized initial and final structures of all structures, and the calculated transition states for oxygen migration. Atom colors: Sr – green, Fe – brown, Al – silver, Zr – blue, Nb – purple, W – gray, O – red. All distances are given in Å.

**Table S1** Adsorption energies (eV) and structural parameters (Å) for water adsorption on pure, Al, Zr, Nb, and W-doped structures. Surface atoms are indicated by the s

subscript, while atoms in the water molecule are denoted by the w subscript.

**Table S2** The formation energies (eV) of O<sub>2</sub> after the desorption of H<sub>2</sub> from the i2 and i4 types of pure, Al, Zr, Nb, and W-doped structures.

**Table S3** Fractional coordinates of the relaxed FeO<sub>2</sub> termination of Sr<sub>8</sub>Fe<sub>8</sub>O<sub>24</sub> (001) surface.

**Table S4** Fractional coordinates of the relaxed SrO termination of Sr<sub>8</sub>Fe<sub>8</sub>O<sub>24</sub> (001) surface.

**Table S5** Fractional coordinates of the relaxed FeO<sub>2</sub> termination of Sr<sub>8</sub>Fe<sub>7</sub>AlO<sub>24</sub> (001) surface.

**Table S6** Fractional coordinates of the relaxed SrO termination of Sr<sub>8</sub>Fe<sub>7</sub>AlO<sub>24</sub> (001) surface.

**Table S7** Fractional coordinates of the relaxed FeO<sub>2</sub> termination of Sr<sub>8</sub>Fe<sub>7</sub>ZrO<sub>24</sub> (001) surface.

**Table S8** Fractional coordinates of the relaxed SrO termination of Sr<sub>8</sub>Fe<sub>7</sub>ZrO<sub>24</sub> (001) surface.

**Table S9** Fractional coordinates of the relaxed FeO<sub>2</sub> termination of Sr<sub>8</sub>Fe<sub>7</sub>NbO<sub>24</sub> (001) surface.

**Table S10** Fractional coordinates of the relaxed SrO termination of Sr<sub>8</sub>Fe<sub>7</sub>NbO<sub>24</sub> (001) surface.

**Table S11** Fractional coordinates of the relaxed FeO<sub>2</sub> termination of Sr<sub>8</sub>Fe<sub>7</sub>WO<sub>24</sub> (001) surface.

**Table S12** Fractional coordinates of the relaxed SrO termination of Sr<sub>8</sub>Fe<sub>7</sub>WO<sub>24</sub> (001) surface.

**Table S13** The calculated imaginary frequency and the fractional coordinates of the optimized transition state for H<sub>2</sub>O adsorption on the FeO<sub>2</sub> termination of Sr<sub>8</sub>Fe<sub>8</sub>O<sub>24</sub> (001) surface.

**Table S14** The calculated imaginary frequency and the fractional coordinates of the

optimized transition state for H<sub>2</sub>O adsorption on the SrO termination of Sr<sub>8</sub>Fe<sub>8</sub>O<sub>24</sub> (001) surface.

**Table S15** The calculated imaginary frequency and the fractional coordinates of the optimized transition state for H<sub>2</sub>O adsorption on the FeO<sub>2</sub> termination of Sr<sub>8</sub>Fe<sub>7</sub>AlO<sub>24</sub> (001) surface.

**Table S16** The calculated imaginary frequency and the fractional coordinates of the optimized transition state for H<sub>2</sub>O adsorption on the SrO termination of Sr<sub>8</sub>Fe<sub>7</sub>AlO<sub>24</sub> (001) surface.

**Table S17** The calculated imaginary frequency and the fractional coordinates of the optimized transition state for H<sub>2</sub>O adsorption on the FeO<sub>2</sub> termination of Sr<sub>8</sub>Fe<sub>7</sub>ZrO<sub>24</sub> (001) surface.

**Table S18** The calculated imaginary frequency and the fractional coordinates of the optimized transition state for H<sub>2</sub>O adsorption on the SrO termination of Sr<sub>8</sub>Fe<sub>7</sub>ZrO<sub>24</sub> (001) surface.

**Table S19** The calculated imaginary frequency and the fractional coordinates of the optimized transition state for H<sub>2</sub>O adsorption on the FeO<sub>2</sub> termination of Sr<sub>8</sub>Fe<sub>7</sub>NbO<sub>24</sub> (001) surface.

**Table S20** The calculated imaginary frequency and the fractional coordinates of the optimized transition state for H<sub>2</sub>O adsorption on the SrO termination of Sr<sub>8</sub>Fe<sub>7</sub>NbO<sub>24</sub> (001) surface.

**Table S21** The calculated imaginary frequency and the fractional coordinates of the optimized transition state for H<sub>2</sub>O adsorption on the FeO<sub>2</sub> termination of Sr<sub>8</sub>Fe<sub>7</sub>WO<sub>24</sub> (001) surface.

**Table S22** The calculated imaginary frequency and the fractional coordinates of the optimized transition state for H<sub>2</sub>O adsorption on the SrO termination of Sr<sub>8</sub>Fe<sub>7</sub>WO<sub>24</sub> (001) surface.

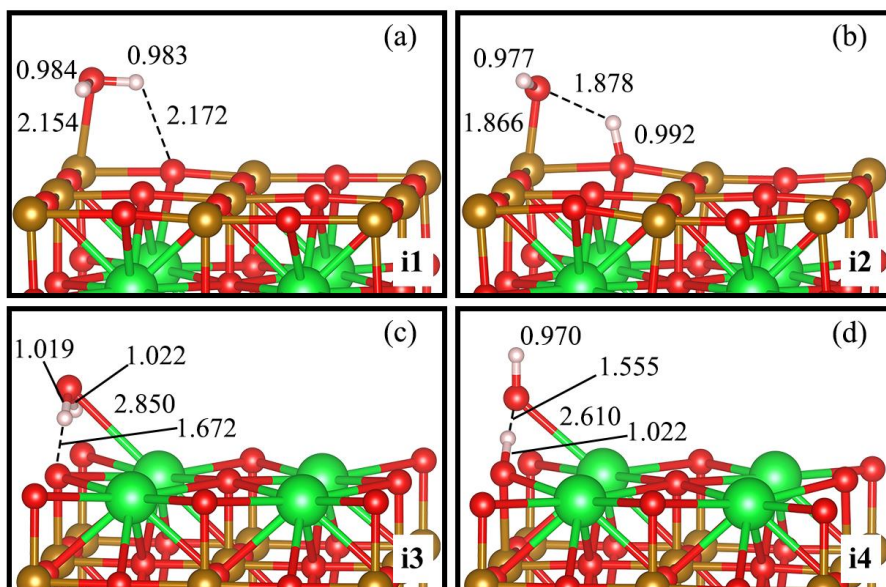

**Fig. S1** Side views of stable i1 (a), i2 (b), i3 (c), and i4 (d) types of pure  $\text{SrFeO}_3$ . Atom colors: Sr – green, Fe – brown, O – red, H – white. All distances are given in Å.

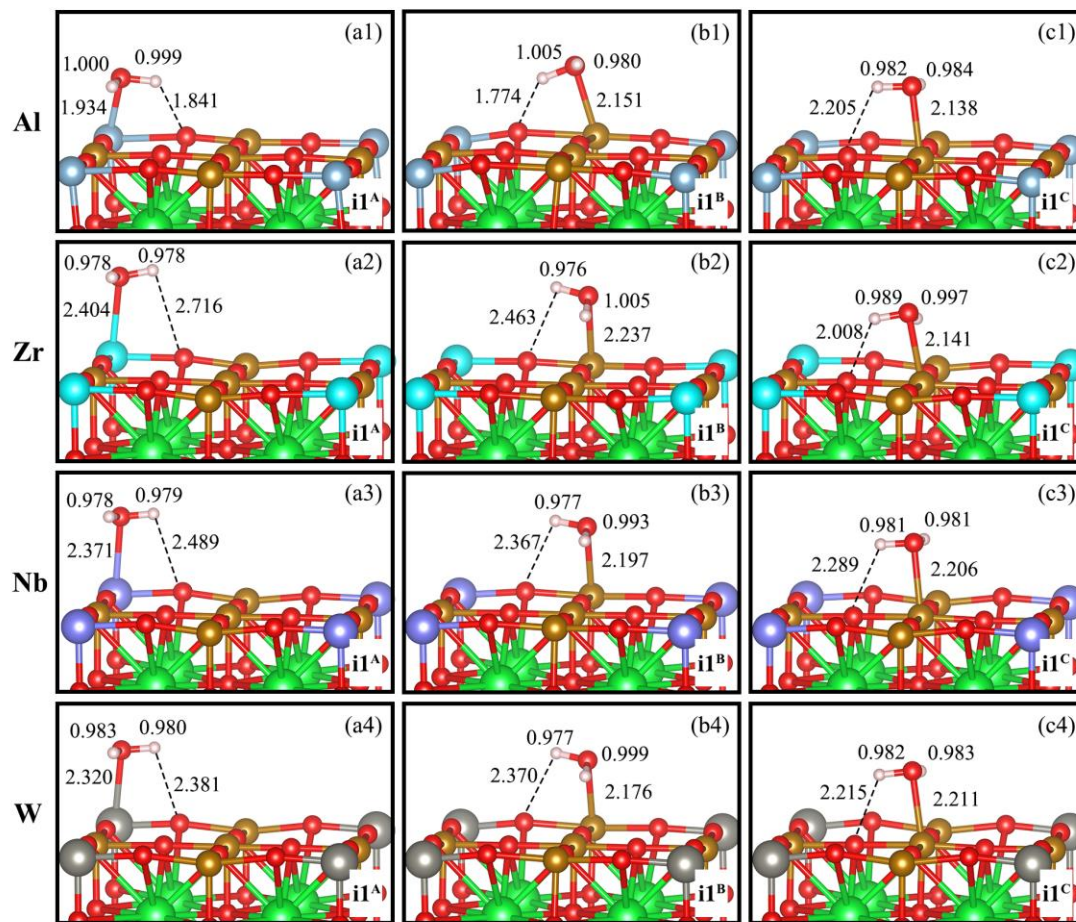

**Fig. S2** Side views of stable i1 type of doped structures – brown, Al – silver, Zr – blue, Nb – purple, W – gray, O – red, H – white. All distances are given in Å.

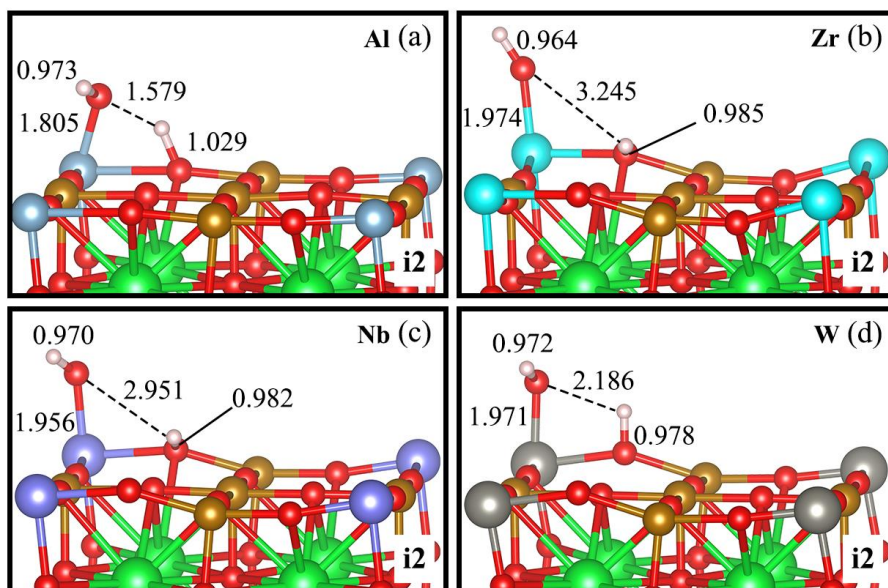

**Fig. S3** Side views of stable i2 type of doped structures. Atom colors: Sr – green, Fe – brown, Al – silver, Zr – blue, Nb – purple, W – gray, O – red, H – white. All distances are given in Å.

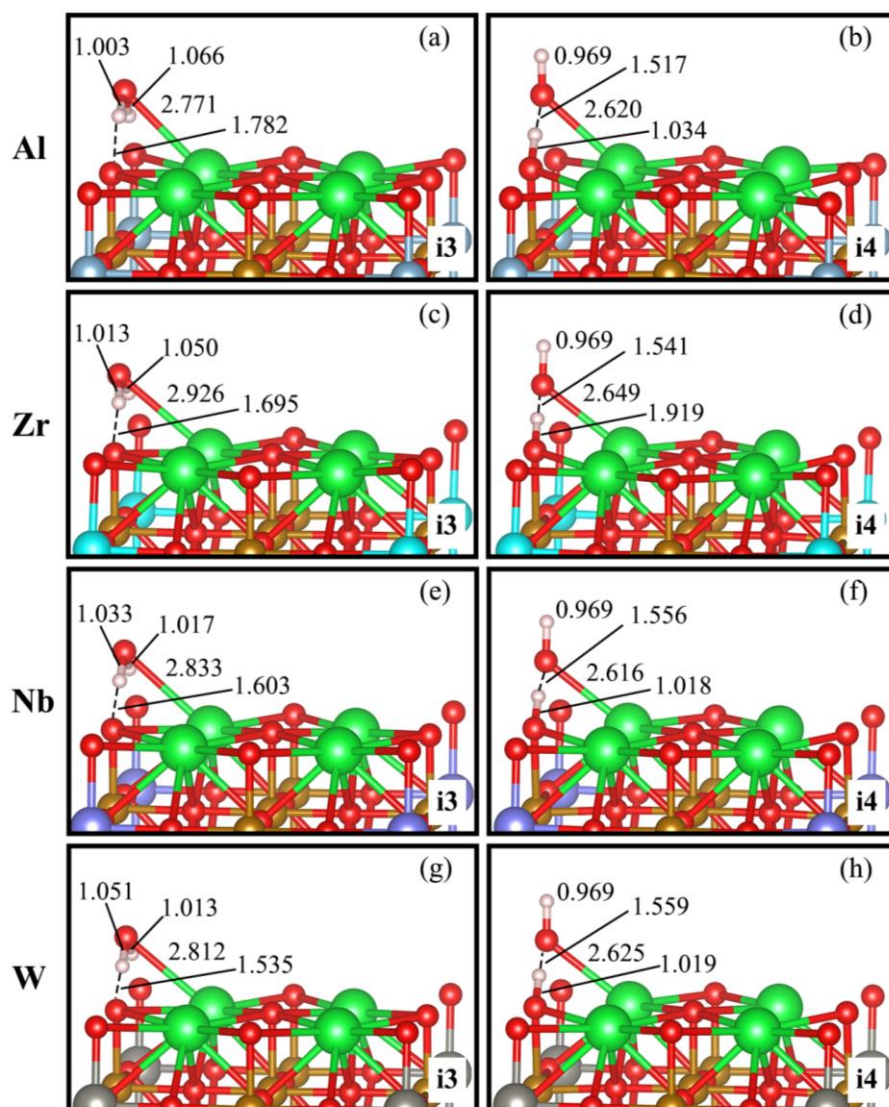

**Fig. S4** Side views of stable i3 and i4 type of doped structures. Atom colors: Sr – green, Fe – brown, Al – silver, Zr – blue, Nb – purple, W – gray, O – red, H – white. All distances are given in Å.



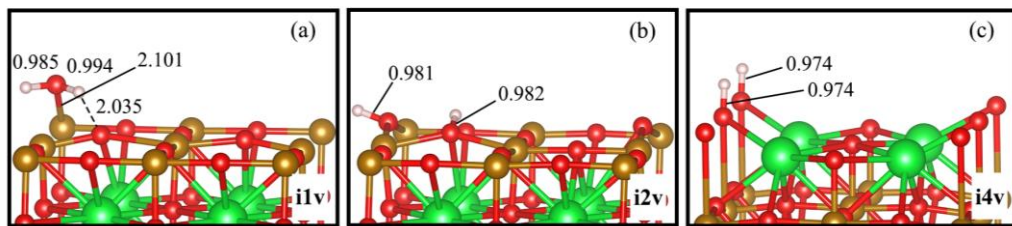

**Fig. S5** Side views of stable i1v (a), i2v (b) and i4v (c) types of pure SrFeO<sub>3</sub>. Atom colors: Sr – green, Fe – brown, O – red, H – white. All distances are given in Å.

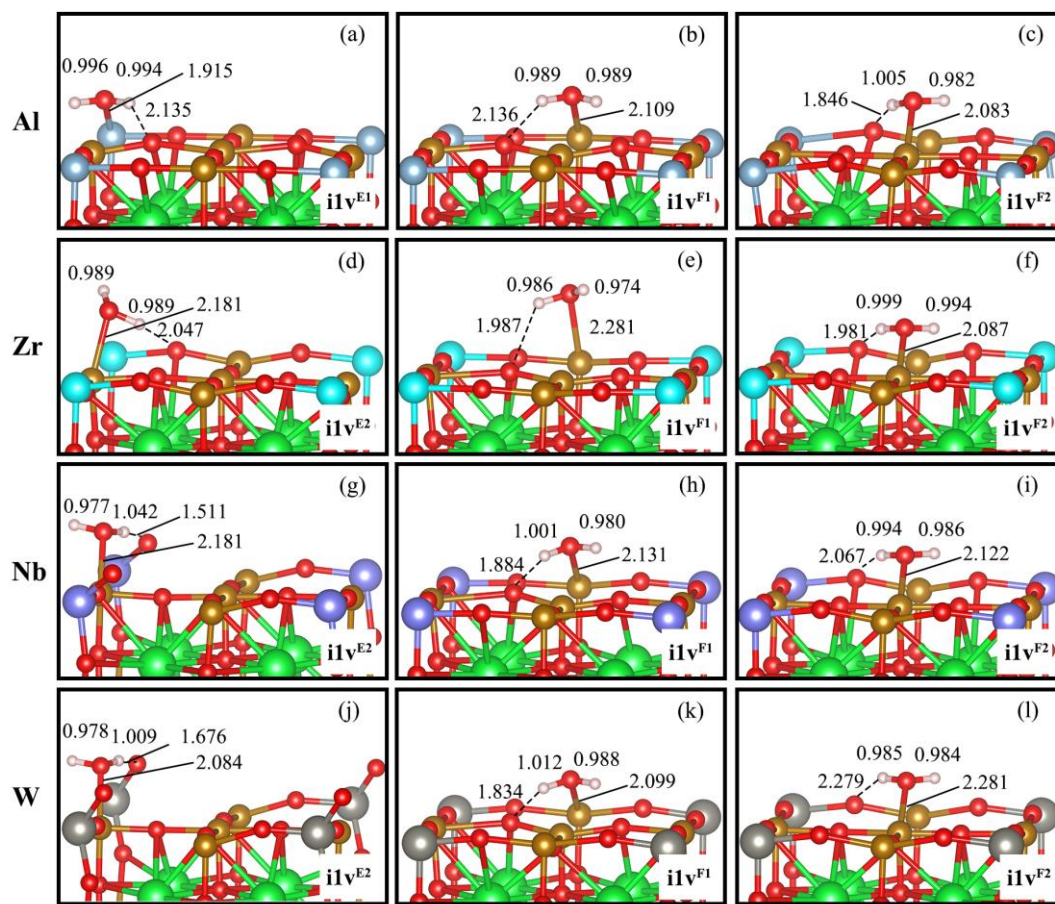

**Fig. S6** Side views of stable *i1v* type of doped structures. Atom colors: Sr – green, Fe – brown, Al – silver, Zr – blue, Nb – purple, W – gray, O – red, H – white. All distances are given in Å.

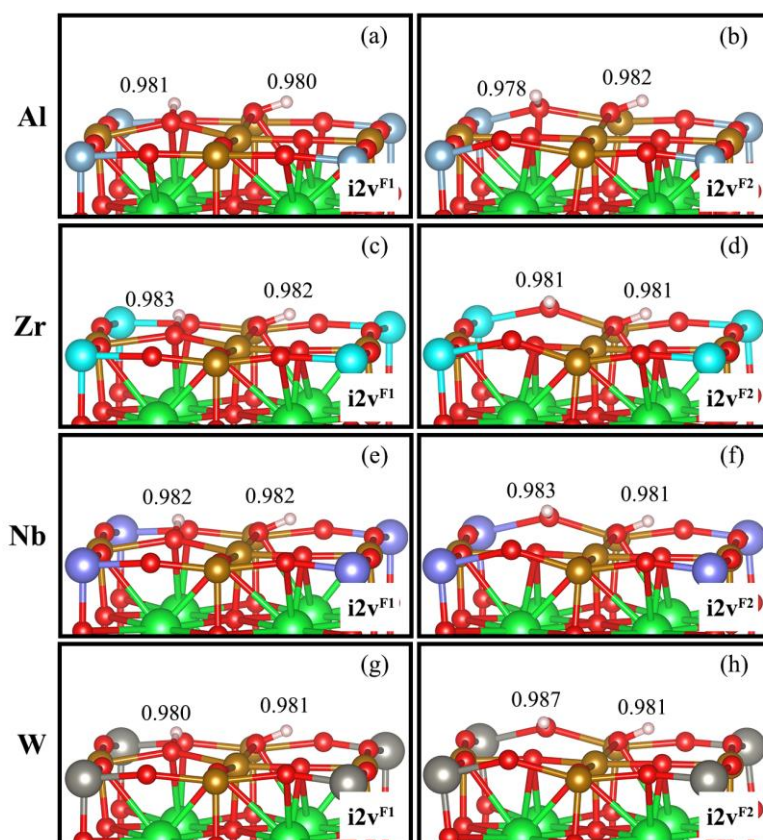

**Fig. S7** Side views of stable  $i2v^F$  type of doped structures. Atom colors: Sr – green, Fe – brown, Al – silver, Zr – blue, Nb – purple, W – gray, O – red, H – white. All distances are given in Å.

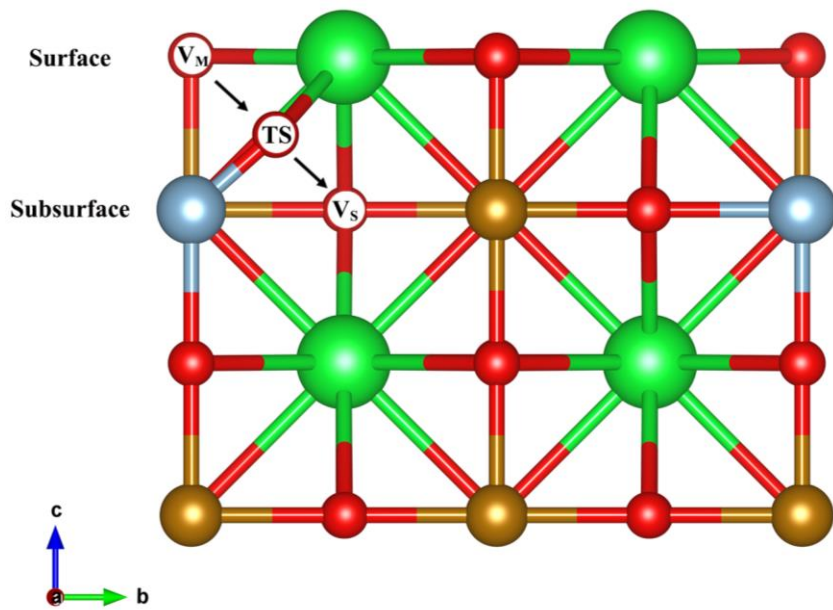

**Fig. S8** Side views of the oxygen migration from surface  $V_M$  site on the SrO termination to subsurface  $V_S$  site in doped structures. Atom colors: Sr – green, Fe – brown, M (Al, Zr, Nb or W) – silver, O – red.

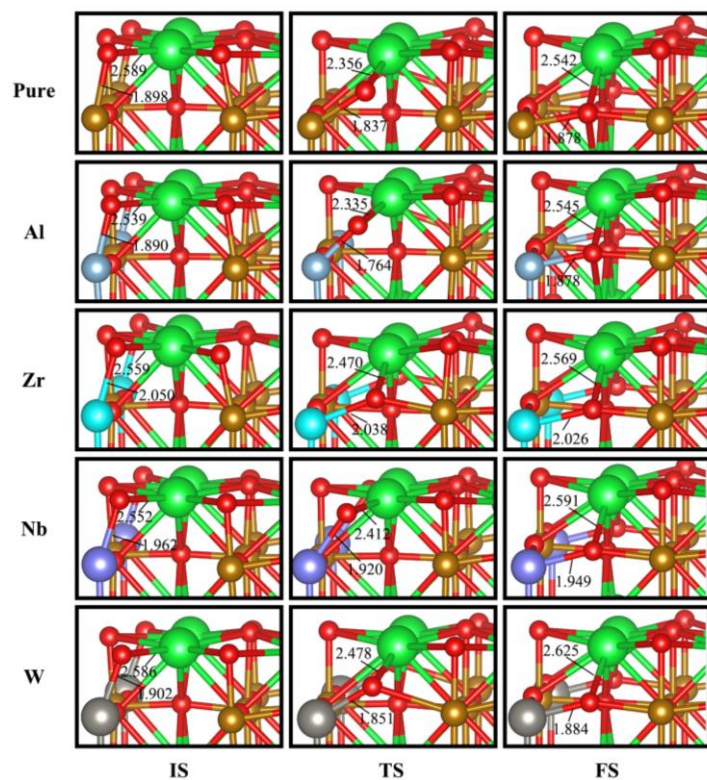

**Fig. S9** The optimized initial and final structures of all structures, and the calculated transition states for oxygen migration. Atom colors: Sr – green, Fe – brown, Al – silver, Zr – blue, Nb – purple, W – gray, O – red. All distances are given in Å.

**Table S1** Adsorption energies (eV) and structural parameters (Å) for water adsorption on pure, Al, Zr, Nb, and W-doped structures. Surface atoms are indicated by the s subscript, while atoms in the water molecule are denoted by the w subscript.

| Type            |                                     | Pure  | Al    | Zr    | Nb    | W     |
|-----------------|-------------------------------------|-------|-------|-------|-------|-------|
| i1 <sup>A</sup> | E <sub>ads</sub>                    | -0.71 | -0.93 | -0.86 | -0.75 | -0.99 |
|                 | d(M <sub>s</sub> -O <sub>w</sub> )  | 2.154 | 1.934 | 2.404 | 2.371 | 2.320 |
|                 | d(O <sub>s</sub> -H <sub>w</sub> )  | 2.172 | 1.841 | 2.716 | 2.489 | 2.381 |
| i1 <sup>B</sup> | E <sub>ads</sub>                    | -0.71 | -0.65 | -0.47 | -0.56 | -0.77 |
|                 | d(M <sub>s</sub> -O <sub>w</sub> )  | 2.154 | 2.151 | 2.237 | 2.197 | 2.196 |
|                 | d(O <sub>s</sub> -H <sub>w</sub> )  | 2.172 | 1.774 | 2.463 | 2.367 | 2.370 |
| i1 <sup>C</sup> | E <sub>ads</sub>                    | -0.71 | -0.67 | -0.74 | -0.49 | -0.66 |
|                 | d(M <sub>s</sub> -O <sub>w</sub> )  | 2.154 | 2.138 | 2.141 | 2.206 | 2.211 |
|                 | d(O <sub>s</sub> -H <sub>w</sub> )  | 2.172 | 2.205 | 2.008 | 2.289 | 2.215 |
| i2              | E <sub>ads</sub>                    | -0.61 | -0.92 | -1.09 | -0.93 | -1.29 |
|                 | d(M <sub>s</sub> -O <sub>w</sub> )  | 1.866 | 1.805 | 1.974 | 1.956 | 1.971 |
|                 | d(O <sub>s</sub> -H <sub>w</sub> )  | 0.992 | 1.029 | 0.985 | 0.982 | 0.978 |
| i3              | E <sub>ads</sub>                    | -0.74 | -0.81 | -0.93 | -0.85 | -1.33 |
|                 | d(Sr <sub>s</sub> -O <sub>w</sub> ) | 2.850 | 2.771 | 2.926 | 2.833 | 2.812 |
|                 | d(O <sub>s</sub> -H <sub>w</sub> )  | 1.672 | 1.782 | 1.695 | 1.603 | 1.535 |
| i4              | E <sub>ads</sub>                    | -0.98 | -1.17 | -1.04 | -1.07 | -1.61 |
|                 | d(Sr <sub>s</sub> -O <sub>w</sub> ) | 2.610 | 2.620 | 2.649 | 2.616 | 2.625 |
|                 | d(O <sub>s</sub> -H <sub>w</sub> )  | 1.022 | 1.034 | 1.919 | 1.018 | 1.019 |

**Table S2** The formation energies (eV) of O<sub>2</sub> after the desorption of H<sub>2</sub> from the i2 and i4 types of pure, Al, Zr, Nb, and W-doped structures.

| Structure | FeO <sub>2</sub> -terminated (i2)<br>(Relaxed)/eV | SrO-terminated (i4)<br>(Relaxed)/eV |
|-----------|---------------------------------------------------|-------------------------------------|
| Pure      | -1.28                                             | -1.21                               |
| M=Al      | -1.30                                             | -1.31                               |
| M=Zr      | -1.25                                             | -1.19                               |
| M=Nb      | -0.26                                             | -1.10                               |
| M=W       | 0.48                                              | -0.72                               |

**Table S3** Fractional coordinates of the relaxed FeO<sub>2</sub> termination of Sr<sub>8</sub>Fe<sub>8</sub>O<sub>24</sub> (001) surface.

O Fe Sr

|                    |                    |                     |
|--------------------|--------------------|---------------------|
| 1.0000000000000000 |                    |                     |
| 7.7625000000000002 | 0.0000000000000000 | 0.0000000000000000  |
| 0.0000000000000005 | 7.7625000000000002 | 0.0000000000000000  |
| 0.0000000000000013 | 0.0000000000000013 | 20.8218999999999994 |

|    |    |    |
|----|----|----|
| O  | Fe | Sr |
| 24 | 8  | 8  |

Selective dynamics

Direct

|                     |                     |                    |   |   |   |
|---------------------|---------------------|--------------------|---|---|---|
| 0.0000000000000000  | 0.0000000000000000  | 0.0480299999999971 | F | F | F |
| 0.2500000000000000  | 0.0000000000000000  | 0.3285649487842169 | T | T | T |
| -0.0000000000000000 | 0.2500000000000000  | 0.3285649487842169 | T | T | T |
| 0.5000000000000000  | 0.0000000000000000  | 0.0480299999999971 | F | F | F |
| 0.7500000000000000  | -0.0000000000000000 | 0.3285649487842169 | T | T | T |
| 0.5000000000000000  | 0.2500000000000000  | 0.3285649487842169 | T | T | T |
| 0.0000000000000000  | 0.5000000000000000  | 0.0480299999999971 | F | F | F |
| 0.2500000000000000  | 0.5000000000000000  | 0.3285649487842169 | T | T | T |
| -0.0000000000000000 | 0.7500000000000000  | 0.3285649487842169 | T | T | T |
| 0.5000000000000000  | 0.5000000000000000  | 0.0480299999999971 | F | F | F |
| 0.7500000000000000  | 0.5000000000000000  | 0.3285649487842169 | T | T | T |
| 0.5000000000000000  | 0.7500000000000000  | 0.3285649487842169 | T | T | T |
| 0.0000000000000000  | 0.0000000000000000  | 0.2323327875146111 | T | T | T |
| 0.2500000000000000  | 0.0000000000000000  | 0.1412300000000002 | F | F | F |
| 0.0000000000000000  | 0.2500000000000000  | 0.1412300000000002 | F | F | F |
| 0.5000000000000000  | 0.0000000000000000  | 0.2323327875146111 | T | T | T |



|                     |                     |                    |   |   |   |
|---------------------|---------------------|--------------------|---|---|---|
| 0.7500000000000000  | 0.0000000000000000  | 0.1412300000000002 | F | F | F |
| 0.5000000000000000  | 0.2500000000000000  | 0.1412300000000002 | F | F | F |
| 0.0000000000000000  | 0.5000000000000000  | 0.2323327875146111 | T | T | T |
| 0.2500000000000000  | 0.5000000000000000  | 0.1412300000000002 | F | F | F |
| 0.0000000000000000  | 0.7500000000000000  | 0.1412300000000002 | F | F | F |
| 0.5000000000000000  | 0.5000000000000000  | 0.2323327875146111 | T | T | T |
| 0.7500000000000000  | 0.5000000000000000  | 0.1412300000000002 | F | F | F |
| 0.5000000000000000  | 0.7500000000000000  | 0.1412300000000002 | F | F | F |
| -0.0000000000000000 | -0.0000000000000000 | 0.3259439481075966 | T | T | T |
| 0.5000000000000000  | -0.0000000000000000 | 0.3259439481075966 | T | T | T |
| -0.0000000000000000 | 0.5000000000000000  | 0.3259439481075966 | T | T | T |
| 0.5000000000000000  | 0.5000000000000000  | 0.3259439481075966 | T | T | T |
| 0.0000000000000000  | 0.0000000000000000  | 0.1412300000000002 | F | F | F |
| 0.5000000000000000  | 0.0000000000000000  | 0.1412300000000002 | F | F | F |
| 0.0000000000000000  | 0.5000000000000000  | 0.1412300000000002 | F | F | F |
| 0.5000000000000000  | 0.5000000000000000  | 0.1412300000000002 | F | F | F |
| 0.2500000000000000  | 0.2500000000000000  | 0.0480299999999971 | F | F | F |
| 0.7500000000000000  | 0.2500000000000000  | 0.0480299999999971 | F | F | F |
| 0.2500000000000000  | 0.7500000000000000  | 0.0480299999999971 | F | F | F |
| 0.7500000000000000  | 0.7500000000000000  | 0.0480299999999971 | F | F | F |
| 0.2500000000000000  | 0.2500000000000000  | 0.2379210977077245 | T | T | T |
| 0.7500000000000000  | 0.2500000000000000  | 0.2379210977077245 | T | T | T |
| 0.2500000000000000  | 0.7500000000000000  | 0.2379210977077245 | T | T | T |
| 0.7500000000000000  | 0.7500000000000000  | 0.2379210977077245 | T | T | T |

**Table S4** Fractional coordinates of the relaxed SrO termination of Sr<sub>8</sub>Fe<sub>8</sub>O<sub>24</sub> (001) surface.

O Fe Sr

|                    |                    |                     |
|--------------------|--------------------|---------------------|
| 1.0000000000000000 |                    |                     |
| 7.7625000000000002 | 0.0000000000000000 | 0.0000000000000000  |
| 0.0000000000000005 | 7.7625000000000002 | 0.0000000000000000  |
| 0.0000000000000013 | 0.0000000000000013 | 20.8218999999999994 |

|    |    |    |
|----|----|----|
| O  | Fe | Sr |
| 24 | 8  | 8  |

Selective dynamics

Direct

|                     |                     |                    |   |   |   |
|---------------------|---------------------|--------------------|---|---|---|
| -0.0000000000000000 | -0.0000000000000000 | 0.3275716266218510 | T | T | T |
| 0.2500000000000000  | -0.0000000000000000 | 0.2346614162522072 | T | T | T |
| -0.0000000000000000 | 0.2500000000000000  | 0.2346614162522072 | T | T | T |
| 0.5000000000000000  | -0.0000000000000000 | 0.3275716266218510 | T | T | T |
| 0.7500000000000000  | -0.0000000000000000 | 0.2346614162522072 | T | T | T |
| 0.5000000000000000  | 0.2500000000000000  | 0.2346614162522072 | T | T | T |
| -0.0000000000000000 | 0.5000000000000000  | 0.3275716266218510 | T | T | T |
| 0.2500000000000000  | 0.5000000000000000  | 0.2346614162522072 | T | T | T |
| 0.0000000000000000  | 0.7500000000000000  | 0.2346614162522072 | T | T | T |
| 0.5000000000000000  | 0.5000000000000000  | 0.3275716266218510 | T | T | T |
| 0.7500000000000000  | 0.5000000000000000  | 0.2346614162522072 | T | T | T |
| 0.5000000000000000  | 0.7500000000000000  | 0.2346614162522072 | T | T | T |
| 0.0000000000000000  | 0.0000000000000000  | 0.1412300000000002 | F | F | F |
| 0.2500000000000000  | 0.0000000000000000  | 0.0480299999999971 | F | F | F |
| 0.0000000000000000  | 0.2500000000000000  | 0.0480299999999971 | F | F | F |
| 0.5000000000000000  | 0.0000000000000000  | 0.1412300000000002 | F | F | F |

|                     |                     |                    |   |   |   |
|---------------------|---------------------|--------------------|---|---|---|
| 0.7500000000000000  | 0.0000000000000000  | 0.0480299999999971 | F | F | F |
| 0.5000000000000000  | 0.2500000000000000  | 0.0480299999999971 | F | F | F |
| 0.0000000000000000  | 0.5000000000000000  | 0.1412300000000002 | F | F | F |
| 0.2500000000000000  | 0.5000000000000000  | 0.0480299999999971 | F | F | F |
| 0.0000000000000000  | 0.7500000000000000  | 0.0480299999999971 | F | F | F |
| 0.5000000000000000  | 0.5000000000000000  | 0.1412300000000002 | F | F | F |
| 0.7500000000000000  | 0.5000000000000000  | 0.0480299999999971 | F | F | F |
| 0.5000000000000000  | 0.7500000000000000  | 0.0480299999999971 | F | F | F |
| -0.0000000000000000 | -0.0000000000000000 | 0.2355196718804249 | T | T | T |
| 0.5000000000000000  | -0.0000000000000000 | 0.2355196718804249 | T | T | T |
| -0.0000000000000000 | 0.5000000000000000  | 0.2355196718804249 | T | T | T |
| 0.5000000000000000  | 0.5000000000000000  | 0.2355196718804249 | T | T | T |
| 0.0000000000000000  | 0.0000000000000000  | 0.0480299999999971 | F | F | F |
| 0.5000000000000000  | 0.0000000000000000  | 0.0480299999999971 | F | F | F |
| 0.0000000000000000  | 0.5000000000000000  | 0.0480299999999971 | F | F | F |
| 0.5000000000000000  | 0.5000000000000000  | 0.0480299999999971 | F | F | F |
| 0.2500000000000000  | 0.2500000000000000  | 0.3170095512422101 | T | T | T |
| 0.7500000000000000  | 0.2500000000000000  | 0.3170095512422101 | T | T | T |
| 0.2500000000000000  | 0.7500000000000000  | 0.3170095512422101 | T | T | T |
| 0.7500000000000000  | 0.7500000000000000  | 0.3170095512422101 | T | T | T |
| 0.2500000000000000  | 0.2500000000000000  | 0.1412300000000002 | F | F | F |
| 0.7500000000000000  | 0.2500000000000000  | 0.1412300000000002 | F | F | F |
| 0.2500000000000000  | 0.7500000000000000  | 0.1412300000000002 | F | F | F |
| 0.7500000000000000  | 0.7500000000000000  | 0.1412300000000002 | F | F | F |

**Table S5** Fractional coordinates of the relaxed FeO<sub>2</sub> termination of Sr<sub>8</sub>Fe<sub>7</sub>AlO<sub>24</sub> (001) surface.

O Al Fe Sr

|                    |                    |                    |  |
|--------------------|--------------------|--------------------|--|
| 1.0000000000000000 |                    |                    |  |
| 7.7388000000000003 | 0.0000000000000000 | 0.0000000000000000 |  |
| 0.0000000000000005 | 7.7388000000000003 | 0.0000000000000000 |  |
| 0.0000000000000013 | 0.0000000000000013 | 20.810099999999985 |  |

|    |    |    |    |
|----|----|----|----|
| O  | Al | Fe | Sr |
| 24 | 1  | 7  | 8  |

Selective dynamics

Direct

|                     |                    |                    |   |   |   |
|---------------------|--------------------|--------------------|---|---|---|
| 0.0000000000000000  | 0.0000000000000000 | 0.0488599999999977 | F | F | F |
| 0.2482084284687987  | 0.0000000000000000 | 0.3286194275237309 | T | T | T |
| -0.0000000000000000 | 0.2482084284687987 | 0.3286194275237309 | T | T | T |
| 0.5000000000000000  | 0.0000000000000000 | 0.0489099999999993 | F | F | F |
| 0.7517915715312014  | 0.0000000000000000 | 0.3286194275237309 | T | T | T |
| 0.5000000000000000  | 0.2511040258169404 | 0.3287143885567403 | T | T | T |
| 0.0000000000000000  | 0.5000000000000000 | 0.0489099999999993 | F | F | F |
| 0.2511040258169404  | 0.5000000000000000 | 0.3287143885567403 | T | T | T |
| -0.0000000000000000 | 0.7517915715312014 | 0.3286194275237309 | T | T | T |
| 0.5000000000000000  | 0.5000000000000000 | 0.0481100000000012 | F | F | F |
| 0.7488959741830595  | 0.5000000000000000 | 0.3287143885567403 | T | T | T |
| 0.5000000000000000  | 0.7488959741830595 | 0.3287143885567403 | T | T | T |
| -0.0000000000000000 | 0.0000000000000000 | 0.2324606979873331 | T | T | T |
| 0.2515399999999985  | 0.0000000000000000 | 0.1413099999999972 | F | F | F |
| 0.0000000000000000  | 0.2515399999999985 | 0.1413099999999972 | F | F | F |

|                     |                    |                    |   |   |   |
|---------------------|--------------------|--------------------|---|---|---|
| 0.5000000000000000  | 0.0000000000000000 | 0.2317380547325398 | T | T | T |
| 0.7484600000000015  | 0.0000000000000000 | 0.1413099999999972 | F | F | F |
| 0.5000000000000000  | 0.2493699999999990 | 0.1413099999999972 | F | F | F |
| -0.0000000000000000 | 0.5000000000000000 | 0.2317380547325398 | T | T | T |
| 0.2493699999999990  | 0.5000000000000000 | 0.1413099999999972 | F | F | F |
| 0.0000000000000000  | 0.7484600000000015 | 0.1413099999999972 | F | F | F |
| 0.5000000000000000  | 0.5000000000000000 | 0.2322176298063957 | T | T | T |
| 0.7506300000000010  | 0.5000000000000000 | 0.1413099999999972 | F | F | F |
| 0.5000000000000000  | 0.7506300000000010 | 0.1413099999999972 | F | F | F |
| -0.0000000000000000 | 0.0000000000000000 | 0.3220988726831671 | T | T | T |
| 0.5000000000000000  | 0.0000000000000000 | 0.3265018272163130 | T | T | T |
| -0.0000000000000000 | 0.5000000000000000 | 0.3265018272163130 | T | T | T |
| 0.5000000000000000  | 0.5000000000000000 | 0.3259105704242679 | T | T | T |
| 0.0000000000000000  | 0.0000000000000000 | 0.1413099999999972 | F | F | F |
| 0.5000000000000000  | 0.0000000000000000 | 0.1413099999999972 | F | F | F |
| 0.0000000000000000  | 0.5000000000000000 | 0.1413099999999972 | F | F | F |
| 0.5000000000000000  | 0.5000000000000000 | 0.1413099999999972 | F | F | F |
| 0.2492299999999972  | 0.2492299999999972 | 0.0480500000000035 | F | F | F |
| 0.7507700000000028  | 0.2492299999999972 | 0.0480500000000035 | F | F | F |
| 0.2492299999999972  | 0.7507700000000028 | 0.0480500000000035 | F | F | F |
| 0.7507700000000028  | 0.7507700000000028 | 0.0480500000000035 | F | F | F |
| 0.2497829222929857  | 0.2497829222929857 | 0.2378023711332429 | T | T | T |
| 0.7502170777070142  | 0.2497829222929857 | 0.2378023711332429 | T | T | T |
| 0.2497829222929857  | 0.7502170777070142 | 0.2378023711332429 | T | T | T |
| 0.7502170777070142  | 0.7502170777070142 | 0.2378023711332429 | T | T | T |

**Table S6** Fractional coordinates of the relaxed SrO termination of Sr<sub>8</sub>Fe<sub>7</sub>AlO<sub>24</sub> (001) surface.

O Al Fe Sr

|                    |                    |                    |  |
|--------------------|--------------------|--------------------|--|
| 1.0000000000000000 |                    |                    |  |
| 7.7388000000000003 | 0.0000000000000000 | 0.0000000000000000 |  |
| 0.0000000000000005 | 7.7388000000000003 | 0.0000000000000000 |  |
| 0.0000000000000013 | 0.0000000000000013 | 20.815999999999989 |  |

|    |    |    |    |
|----|----|----|----|
| O  | Al | Fe | Sr |
| 24 | 1  | 7  | 8  |

Selective dynamics

Direct

|                     |                     |                    |   |   |   |
|---------------------|---------------------|--------------------|---|---|---|
| -0.0000000000000000 | -0.0000000000000000 | 0.3245831096852920 | T | T | T |
| 0.2535097219226664  | -0.0000000000000000 | 0.2329159171216238 | T | T | T |
| -0.0000000000000000 | 0.2535097219226664  | 0.2329159171216238 | T | T | T |
| 0.5000000000000000  | -0.0000000000000000 | 0.3266753829923117 | T | T | T |
| 0.7464902780773337  | -0.0000000000000000 | 0.2329159171216238 | T | T | T |
| 0.5000000000000000  | 0.2523316174593678  | 0.2347019938060292 | T | T | T |
| -0.0000000000000000 | 0.5000000000000000  | 0.3266753829923117 | T | T | T |
| 0.2523316174593678  | 0.5000000000000000  | 0.2347019938060292 | T | T | T |
| -0.0000000000000000 | 0.7464902780773337  | 0.2329159171216238 | T | T | T |
| 0.5000000000000000  | 0.5000000000000000  | 0.3275002648050378 | T | T | T |
| 0.7476683825406323  | 0.5000000000000000  | 0.2347019938060292 | T | T | T |
| 0.5000000000000000  | 0.7476683825406323  | 0.2347019938060292 | T | T | T |
| 0.0000000000000000  | 0.0000000000000000  | 0.1404599999999974 | F | F | F |
| 0.2515399999999985  | 0.0000000000000000  | 0.0480400000000003 | F | F | F |
| 0.0000000000000000  | 0.2515399999999985  | 0.0480400000000003 | F | F | F |

|                     |                     |                    |   |   |   |
|---------------------|---------------------|--------------------|---|---|---|
| 0.5000000000000000  | 0.0000000000000000  | 0.1404100000000028 | F | F | F |
| 0.7484600000000015  | 0.0000000000000000  | 0.0480400000000003 | F | F | F |
| 0.5000000000000000  | 0.2493699999999990  | 0.0480400000000003 | F | F | F |
| 0.0000000000000000  | 0.5000000000000000  | 0.1404100000000028 | F | F | F |
| 0.2493699999999990  | 0.5000000000000000  | 0.0480400000000003 | F | F | F |
| 0.0000000000000000  | 0.7484600000000015  | 0.0480400000000003 | F | F | F |
| 0.5000000000000000  | 0.5000000000000000  | 0.1412199999999970 | F | F | F |
| 0.7506300000000010  | 0.5000000000000000  | 0.0480400000000003 | F | F | F |
| 0.5000000000000000  | 0.7506300000000010  | 0.0480400000000003 | F | F | F |
| -0.0000000000000000 | -0.0000000000000000 | 0.2330792752767148 | T | T | T |
| 0.5000000000000000  | -0.0000000000000000 | 0.2353092466779780 | T | T | T |
| -0.0000000000000000 | 0.5000000000000000  | 0.2353092466779780 | T | T | T |
| 0.5000000000000000  | 0.5000000000000000  | 0.2370313518721872 | T | T | T |
| 0.0000000000000000  | 0.0000000000000000  | 0.0480400000000003 | F | F | F |
| 0.5000000000000000  | 0.0000000000000000  | 0.0480400000000003 | F | F | F |
| 0.0000000000000000  | 0.5000000000000000  | 0.0480400000000003 | F | F | F |
| 0.5000000000000000  | 0.5000000000000000  | 0.0480400000000003 | F | F | F |
| 0.2454668751097228  | 0.2454668751097228  | 0.3167234416745895 | T | T | T |
| 0.7545331248902771  | 0.2454668751097228  | 0.3167234416745895 | T | T | T |
| 0.2454668751097228  | 0.7545331248902771  | 0.3167234416745895 | T | T | T |
| 0.7545331248902771  | 0.7545331248902771  | 0.3167234416745895 | T | T | T |
| 0.2492299999999972  | 0.2492299999999972  | 0.1412699999999987 | F | F | F |
| 0.7507700000000028  | 0.2492299999999972  | 0.1412699999999987 | F | F | F |
| 0.2492299999999972  | 0.7507700000000028  | 0.1412699999999987 | F | F | F |
| 0.7507700000000028  | 0.7507700000000028  | 0.1412699999999987 | F | F | F |

**Table S7** Fractional coordinates of the relaxed FeO<sub>2</sub> termination of Sr<sub>8</sub>Fe<sub>7</sub>ZrO<sub>24</sub> (001) surface.

O Zr Fe Sr

|                    |                    |                    |
|--------------------|--------------------|--------------------|
| 1.0000000000000000 |                    |                    |
| 7.8491000000000000 | 0.0000000000000000 | 0.0000000000000000 |
| 0.0000000000000005 | 7.8491000000000000 | 0.0000000000000000 |
| 0.0000000000000013 | 0.0000000000000013 | 20.873799999999992 |

|    |    |    |    |
|----|----|----|----|
| O  | Zr | Fe | Sr |
| 24 | 1  | 7  | 8  |

Selective dynamics

Direct

|                    |                    |                    |   |   |   |
|--------------------|--------------------|--------------------|---|---|---|
| 0.0000000000000000 | 0.0000000000000000 | 0.0523299999999978 | F | F | F |
| 0.2664157004546704 | 0.0000004503413632 | 0.3347639971740875 | T | T | T |
| 0.0000004503413632 | 0.2664157004546704 | 0.3347639971740875 | T | T | T |
| 0.5000000000000000 | 0.0000000000000000 | 0.0487299999999991 | F | F | F |
| 0.7335847376521258 | 0.0000004241321372 | 0.3347640251937642 | T | T | T |
| 0.5000001808013962 | 0.2548194767150235 | 0.3255484455689323 | T | T | T |
| 0.0000000000000000 | 0.5000000000000000 | 0.0487299999999991 | F | F | F |
| 0.2548194767150235 | 0.5000001808013962 | 0.3255484455689323 | T | T | T |
| 0.0000004241321372 | 0.7335847376521258 | 0.3347640251937642 | T | T | T |
| 0.5000000000000000 | 0.5000000000000000 | 0.0479100000000017 | F | F | F |
| 0.7451803685356863 | 0.5000001940552861 | 0.3255486605359175 | T | T | T |
| 0.5000001940552861 | 0.7451803685356863 | 0.3255486605359175 | T | T | T |
| 0.0000002854872062 | 0.0000002854872062 | 0.2374361510243113 | T | T | T |
| 0.2538600000000031 | 0.0000000000000000 | 0.1412899999999979 | F | F | F |
| 0.0000000000000000 | 0.2538600000000031 | 0.1412899999999979 | F | F | F |



|                     |                     |                    |   |   |   |
|---------------------|---------------------|--------------------|---|---|---|
| 0.5000003004999968  | -0.0000000126920939 | 0.2324177079212518 | T | T | T |
| 0.7461399999999969  | 0.0000000000000000  | 0.1412899999999979 | F | F | F |
| 0.5000000000000000  | 0.2516600000000011  | 0.1412899999999979 | F | F | F |
| -0.0000000126920939 | 0.5000003004999968  | 0.2324177079212518 | T | T | T |
| 0.2516600000000011  | 0.5000000000000000  | 0.1412899999999979 | F | F | F |
| 0.0000000000000000  | 0.7461399999999969  | 0.1412899999999979 | F | F | F |
| 0.4999999526131603  | 0.4999999526131603  | 0.2309220082376367 | T | T | T |
| 0.7483399999999989  | 0.5000000000000000  | 0.1412899999999979 | F | F | F |
| 0.5000000000000000  | 0.7483399999999989  | 0.1412899999999979 | F | F | F |
| 0.0000002041681919  | 0.0000002041681919  | 0.3339042418366789 | T | T | T |
| 0.5000002034798791  | 0.0000013835019578  | 0.3253954301309051 | T | T | T |
| 0.0000013835019578  | 0.5000002034798791  | 0.3253954301309051 | T | T | T |
| 0.5000010028645370  | 0.5000010028645370  | 0.3244277116600488 | T | T | T |
| 0.0000000000000000  | 0.0000000000000000  | 0.1412899999999979 | F | F | F |
| 0.5000000000000000  | 0.0000000000000000  | 0.1412899999999979 | F | F | F |
| 0.0000000000000000  | 0.5000000000000000  | 0.1412899999999979 | F | F | F |
| 0.5000000000000000  | 0.5000000000000000  | 0.1412899999999979 | F | F | F |
| 0.2566199999999981  | 0.2566199999999981  | 0.0497700000000023 | F | F | F |
| 0.7433899999999980  | 0.2566199999999981  | 0.0497700000000023 | F | F | F |
| 0.2566199999999981  | 0.7433899999999980  | 0.0497700000000023 | F | F | F |
| 0.7433899999999980  | 0.7433899999999980  | 0.0497700000000023 | F | F | F |
| 0.2544161427545483  | 0.2544161427545483  | 0.2360468761955581 | T | T | T |
| 0.7455842623233171  | 0.2544162149326799  | 0.2360469378031209 | T | T | T |
| 0.2544162149326799  | 0.7455842623233171  | 0.2360469378031209 | T | T | T |
| 0.7455841581429451  | 0.7455841581429451  | 0.2360470534225733 | T | T | T |

**Table S8** Fractional coordinates of the relaxed SrO termination of Sr<sub>8</sub>Fe<sub>7</sub>ZrO<sub>24</sub> (001) surface.

O Zr Fe Sr

|                    |                    |                     |
|--------------------|--------------------|---------------------|
| 1.0000000000000000 |                    |                     |
| 7.8491000000000000 | 0.0000000000000000 | 0.0000000000000000  |
| 0.0000000000000005 | 7.8491000000000000 | 0.0000000000000000  |
| 0.0000000000000013 | 0.0000000000000013 | 20.9923000000000002 |

|    |    |    |    |
|----|----|----|----|
| O  | Zr | Fe | Sr |
| 24 | 1  | 7  | 8  |

Selective dynamics

Direct

|                    |                    |                    |   |   |   |
|--------------------|--------------------|--------------------|---|---|---|
| 0.0000011630189592 | 0.0000011630189592 | 0.3350241514060680 | T | T | T |
| 0.2635662585423476 | 0.0000021939458488 | 0.2342519549413796 | T | T | T |
| 0.0000021939458488 | 0.2635662585423476 | 0.2342519549413796 | T | T | T |
| 0.5000022371503696 | 0.0000022455265600 | 0.3257593503799768 | T | T | T |
| 0.7364366150521610 | 0.0000021774125417 | 0.2342514843255195 | T | T | T |
| 0.5000017782558406 | 0.2587023340489511 | 0.2347977173649752 | T | T | T |
| 0.0000022455265600 | 0.5000022371503696 | 0.3257593503799768 | T | T | T |
| 0.2587023340489511 | 0.5000017782558406 | 0.2347977173649752 | T | T | T |
| 0.0000021774125417 | 0.7364366150521610 | 0.2342514843255195 | T | T | T |
| 0.5000019141749890 | 0.5000019141749890 | 0.3297303113487141 | T | T | T |
| 0.7413011847333774 | 0.5000017860327419 | 0.2347976016084111 | T | T | T |
| 0.5000017860327419 | 0.7413011847333774 | 0.2347976016084111 | T | T | T |
| 0.0000000000000000 | 0.0000000000000000 | 0.1360900000000029 | F | F | F |
| 0.2538600000000031 | 0.0000000000000000 | 0.0476400000000012 | F | F | F |
| 0.0000000000000000 | 0.2538600000000031 | 0.0476400000000012 | F | F | F |

|                    |                    |                    |   |   |   |
|--------------------|--------------------|--------------------|---|---|---|
| 0.5000000000000000 | 0.0000000000000000 | 0.1396700000000024 | F | F | F |
| 0.7461399999999969 | 0.0000000000000000 | 0.0476400000000012 | F | F | F |
| 0.5000000000000000 | 0.2516600000000011 | 0.0476400000000012 | F | F | F |
| 0.0000000000000000 | 0.5000000000000000 | 0.1396700000000024 | F | F | F |
| 0.2516600000000011 | 0.5000000000000000 | 0.0476400000000012 | F | F | F |
| 0.0000000000000000 | 0.7461399999999969 | 0.0476400000000012 | F | F | F |
| 0.5000000000000000 | 0.5000000000000000 | 0.1404899999999998 | F | F | F |
| 0.7483399999999989 | 0.5000000000000000 | 0.0476400000000012 | F | F | F |
| 0.5000000000000000 | 0.7483399999999989 | 0.0476400000000012 | F | F | F |
| 0.0000013906220145 | 0.0000013906220145 | 0.2359398105299555 | T | T | T |
| 0.5000027388885890 | 0.0000016615388373 | 0.2346997203792637 | T | T | T |
| 0.0000016615388373 | 0.5000027388885890 | 0.2346997203792637 | T | T | T |
| 0.5000018014285038 | 0.5000018014285038 | 0.2352082533936198 | T | T | T |
| 0.0000000000000000 | 0.0000000000000000 | 0.0476400000000012 | F | F | F |
| 0.5000000000000000 | 0.0000000000000000 | 0.0476400000000012 | F | F | F |
| 0.0000000000000000 | 0.5000000000000000 | 0.0476400000000012 | F | F | F |
| 0.5000000000000000 | 0.5000000000000000 | 0.0476400000000012 | F | F | F |
| 0.2573982497409782 | 0.2573982497409782 | 0.3179012639015322 | T | T | T |
| 0.7426034434320181 | 0.2573973969402762 | 0.3179012578642323 | T | T | T |
| 0.2573973969402762 | 0.7426034434320181 | 0.3179012578642323 | T | T | T |
| 0.7426042325681159 | 0.7426042325681159 | 0.3179012210409718 | T | T | T |
| 0.2566199999999981 | 0.2566199999999981 | 0.1386400000000023 | F | F | F |
| 0.7433899999999980 | 0.2566199999999981 | 0.1386400000000023 | F | F | F |
| 0.2566199999999981 | 0.7433899999999980 | 0.1386400000000023 | F | F | F |
| 0.7433899999999980 | 0.7433899999999980 | 0.1386400000000023 | F | F | F |

**Table S9** Fractional coordinates of the relaxed FeO<sub>2</sub> termination of Sr<sub>8</sub>Fe<sub>7</sub>NbO<sub>24</sub> (001) surface.

O Nb Fe Sr

|                    |                    |                     |  |
|--------------------|--------------------|---------------------|--|
| 1.0000000000000000 |                    |                     |  |
| 7.8395000000000001 | 0.0000000000000000 | 0.0000000000000000  |  |
| 0.0000000000000005 | 7.8395000000000001 | 0.0000000000000000  |  |
| 0.0000000000000013 | 0.0000000000000013 | 20.8621000000000016 |  |

|    |    |    |    |
|----|----|----|----|
| O  | Nb | Fe | Sr |
| 24 | 1  | 7  | 8  |

Selective dynamics

Direct

|                    |                    |                    |   |   |   |
|--------------------|--------------------|--------------------|---|---|---|
| 0.0000000000000000 | 0.0000000000000000 | 0.0485200000000034 | F | F | F |
| 0.2536999847699140 | 0.0000000000000000 | 0.3358692562867452 | T | T | T |
| 0.0000000000000000 | 0.2536999847699140 | 0.3358692562867452 | T | T | T |
| 0.5000000000000000 | 0.0000000000000000 | 0.0489400000000018 | F | F | F |
| 0.7463000152300860 | 0.0000000000000000 | 0.3358692562867452 | T | T | T |
| 0.5000000000000000 | 0.2607633121649536 | 0.3266477818572792 | T | T | T |
| 0.0000000000000000 | 0.5000000000000000 | 0.0489400000000018 | F | F | F |
| 0.2607633121649536 | 0.5000000000000000 | 0.3266477818572792 | T | T | T |
| 0.0000000000000000 | 0.7463000152300860 | 0.3358692562867452 | T | T | T |
| 0.5000000000000000 | 0.5000000000000000 | 0.0479300000000009 | F | F | F |
| 0.7392366878350467 | 0.5000000000000000 | 0.3266477818572792 | T | T | T |
| 0.5000000000000000 | 0.7392366878350467 | 0.3266477818572792 | T | T | T |
| 0.0000000000000000 | 0.0000000000000000 | 0.2386851112339327 | T | T | T |
| 0.2549300000000017 | 0.0000000000000000 | 0.1410399999999967 | F | F | F |
| 0.0000000000000000 | 0.2549300000000017 | 0.1410399999999967 | F | F | F |

|                    |                    |                    |   |   |   |
|--------------------|--------------------|--------------------|---|---|---|
| 0.5000000000000000 | 0.0000000000000000 | 0.2339602969755552 | T | T | T |
| 0.7450699999999983 | 0.0000000000000000 | 0.1410399999999967 | F | F | F |
| 0.5000000000000000 | 0.2522400000000005 | 0.1410399999999967 | F | F | F |
| 0.0000000000000000 | 0.5000000000000000 | 0.2339602969755552 | T | T | T |
| 0.2522400000000005 | 0.5000000000000000 | 0.1410399999999967 | F | F | F |
| 0.0000000000000000 | 0.7450699999999983 | 0.1410399999999967 | F | F | F |
| 0.5000000000000000 | 0.5000000000000000 | 0.2295375970787996 | T | T | T |
| 0.7477599999999995 | 0.5000000000000000 | 0.1410399999999967 | F | F | F |
| 0.5000000000000000 | 0.7477599999999995 | 0.1410399999999967 | F | F | F |
| 0.0000000000000000 | 0.0000000000000000 | 0.3296020196336100 | T | T | T |
| 0.5000000000000000 | 0.0000000000000000 | 0.3259560886326792 | T | T | T |
| 0.0000000000000000 | 0.5000000000000000 | 0.3259560886326792 | T | T | T |
| 0.5000000000000000 | 0.5000000000000000 | 0.3260792382175727 | T | T | T |
| 0.0000000000000000 | 0.0000000000000000 | 0.1410399999999967 | F | F | F |
| 0.5000000000000000 | 0.0000000000000000 | 0.1410399999999967 | F | F | F |
| 0.0000000000000000 | 0.5000000000000000 | 0.1410399999999967 | F | F | F |
| 0.5000000000000000 | 0.5000000000000000 | 0.1410399999999967 | F | F | F |
| 0.2561999999999998 | 0.2561999999999998 | 0.0494199999999978 | F | F | F |
| 0.7438000000000002 | 0.2561999999999998 | 0.0494199999999978 | F | F | F |
| 0.2561999999999998 | 0.7438000000000002 | 0.0494199999999978 | F | F | F |
| 0.7438000000000002 | 0.7438000000000002 | 0.0494199999999978 | F | F | F |
| 0.2573960529024039 | 0.2573960529024039 | 0.2364480824194356 | T | T | T |
| 0.7426039470975963 | 0.2573960529024039 | 0.2364480824194356 | T | T | T |
| 0.2573960529024039 | 0.7426039470975963 | 0.2364480824194356 | T | T | T |
| 0.7426039470975963 | 0.7426039470975963 | 0.2364480824194356 | T | T | T |

**Table S10** Fractional coordinates of the relaxed SrO termination of Sr<sub>8</sub>Fe<sub>7</sub>NbO<sub>24</sub> (001) surface.

O Nb Fe Sr

|                    |                    |                     |  |
|--------------------|--------------------|---------------------|--|
| 1.0000000000000000 |                    |                     |  |
| 7.8395000000000001 | 0.0000000000000000 | 0.0000000000000000  |  |
| 0.0000000000000005 | 7.8395000000000001 | 0.0000000000000000  |  |
| 0.0000000000000013 | 0.0000000000000013 | 20.9283000000000001 |  |

|    |    |    |    |
|----|----|----|----|
| O  | Nb | Fe | Sr |
| 24 | 1  | 7  | 8  |

Selective dynamics

Direct

|                     |                     |                    |   |   |   |
|---------------------|---------------------|--------------------|---|---|---|
| -0.0000000000000000 | -0.0000000000000000 | 0.3323848078932898 | T | T | T |
| 0.2530656541789250  | -0.0000000000000000 | 0.2357862114548918 | T | T | T |
| -0.0000000000000000 | 0.2530656541789250  | 0.2357862114548918 | T | T | T |
| 0.5000000000000000  | -0.0000000000000000 | 0.3284961789831079 | T | T | T |
| 0.7469343458210747  | -0.0000000000000000 | 0.2357862114548918 | T | T | T |
| 0.5000000000000000  | 0.2517844623696381  | 0.2351505315814085 | T | T | T |
| -0.0000000000000000 | 0.5000000000000000  | 0.3284961789831079 | T | T | T |
| 0.2517844623696381  | 0.5000000000000000  | 0.2351505315814085 | T | T | T |
| -0.0000000000000000 | 0.7469343458210747  | 0.2357862114548918 | T | T | T |
| 0.5000000000000000  | 0.5000000000000000  | 0.3300215926993478 | T | T | T |
| 0.7482155376303619  | 0.5000000000000000  | 0.2351505315814085 | T | T | T |
| 0.5000000000000000  | 0.7482155376303619  | 0.2351505315814085 | T | T | T |
| 0.0000000000000000  | 0.0000000000000000  | 0.1400999999999966 | F | F | F |
| 0.2549300000000017  | 0.0000000000000000  | 0.0477800000000030 | F | F | F |
| 0.0000000000000000  | 0.2549300000000017  | 0.0477800000000030 | F | F | F |

|                     |                     |                    |   |   |   |
|---------------------|---------------------|--------------------|---|---|---|
| 0.5000000000000000  | 0.0000000000000000  | 0.1395800000000023 | F | F | F |
| 0.7450699999999983  | 0.0000000000000000  | 0.0477800000000030 | F | F | F |
| 0.5000000000000000  | 0.2522400000000005  | 0.0477800000000030 | F | F | F |
| 0.0000000000000000  | 0.5000000000000000  | 0.1395800000000023 | F | F | F |
| 0.2522400000000005  | 0.5000000000000000  | 0.0477800000000030 | F | F | F |
| 0.0000000000000000  | 0.7450699999999983  | 0.0477800000000030 | F | F | F |
| 0.5000000000000000  | 0.5000000000000000  | 0.1405900000000031 | F | F | F |
| 0.7477599999999995  | 0.5000000000000000  | 0.0477800000000030 | F | F | F |
| 0.5000000000000000  | 0.7477599999999995  | 0.0477800000000030 | F | F | F |
| -0.0000000000000000 | -0.0000000000000000 | 0.2369833787428623 | T | T | T |
| 0.5000000000000000  | -0.0000000000000000 | 0.2362327776488183 | T | T | T |
| -0.0000000000000000 | 0.5000000000000000  | 0.2362327776488183 | T | T | T |
| 0.5000000000000000  | 0.5000000000000000  | 0.2352319741746561 | T | T | T |
| 0.0000000000000000  | 0.0000000000000000  | 0.0477800000000030 | F | F | F |
| 0.5000000000000000  | 0.0000000000000000  | 0.0477800000000030 | F | F | F |
| 0.0000000000000000  | 0.5000000000000000  | 0.0477800000000030 | F | F | F |
| 0.5000000000000000  | 0.5000000000000000  | 0.0477800000000030 | F | F | F |
| 0.2584250713578896  | 0.2584250713578896  | 0.3186502279267652 | T | T | T |
| 0.7415749286421105  | 0.2584250713578896  | 0.3186502279267652 | T | T | T |
| 0.2584250713578896  | 0.7415749286421105  | 0.3186502279267652 | T | T | T |
| 0.7415749286421105  | 0.7415749286421105  | 0.3186502279267652 | T | T | T |
| 0.2561999999999998  | 0.2561999999999998  | 0.1391100000000023 | F | F | F |
| 0.7438000000000002  | 0.2561999999999998  | 0.1391100000000023 | F | F | F |
| 0.2561999999999998  | 0.7438000000000002  | 0.1391100000000023 | F | F | F |
| 0.7438000000000002  | 0.7438000000000002  | 0.1391100000000023 | F | F | F |

**Table S11** Fractional coordinates of the relaxed FeO<sub>2</sub> termination of Sr<sub>8</sub>Fe<sub>7</sub>WO<sub>24</sub> (001) surface.

O W Fe Sr

1.0000000000000000

7.8437999999999999 0.0000000000000000 0.0000000000000000

0.0000000000000005 7.8437999999999999 0.0000000000000000

0.0000000000000013 0.0000000000000013 20.9165999999999990

O W Fe Sr

24 1 7 8

Selective dynamics

Direct

0.0000000000000000 0.0000000000000000 0.0478099999999984 F F F

0.2426495057893622 0.0000000000000000 0.3385688642729209 T T T

0.0000000000000000 0.2426495057893622 0.3385688642729209 T T T

0.5000000000000000 0.0000000000000000 0.0507599999999968 F F F

0.7573504942106377 0.0000000000000000 0.3385688642729209 T T T

0.5000000000000000 0.2558337880101787 0.3277977380247555 T T T

0.0000000000000000 0.5000000000000000 0.0507599999999968 F F F

0.2558337880101787 0.5000000000000000 0.3277977380247555 T T T

0.0000000000000000 0.7573504942106377 0.3385688642729209 T T T

0.5000000000000000 0.5000000000000000 0.0518199999999993 F F F

0.7441662119898212 0.5000000000000000 0.3277977380247555 T T T

0.5000000000000000 0.7441662119898212 0.3277977380247555 T T T

0.0000000000000000 0.0000000000000000 0.2415235594051936 T T T

0.2535600000000002 0.0000000000000000 0.1431699999999978 F F F

0.0000000000000000 0.2535600000000002 0.1431699999999978 F F F



|                    |                    |                    |   |   |   |
|--------------------|--------------------|--------------------|---|---|---|
| 0.5000000000000000 | 0.0000000000000000 | 0.2367934830148447 | T | T | T |
| 0.7464399999999998 | 0.0000000000000000 | 0.1431699999999978 | F | F | F |
| 0.5000000000000000 | 0.2563999999999993 | 0.1431699999999978 | F | F | F |
| 0.0000000000000000 | 0.5000000000000000 | 0.2367934830148447 | T | T | T |
| 0.2563999999999993 | 0.5000000000000000 | 0.1431699999999978 | F | F | F |
| 0.0000000000000000 | 0.7464399999999998 | 0.1431699999999978 | F | F | F |
| 0.5000000000000000 | 0.5000000000000000 | 0.2325607469522956 | T | T | T |
| 0.7436000000000007 | 0.5000000000000000 | 0.1431699999999978 | F | F | F |
| 0.5000000000000000 | 0.7436000000000007 | 0.1431699999999978 | F | F | F |
| 0.0000000000000000 | 0.0000000000000000 | 0.3295511764864695 | T | T | T |
| 0.5000000000000000 | 0.0000000000000000 | 0.3278869232755739 | T | T | T |
| 0.0000000000000000 | 0.5000000000000000 | 0.3278869232755739 | T | T | T |
| 0.5000000000000000 | 0.5000000000000000 | 0.3283043232123281 | T | T | T |
| 0.0000000000000000 | 0.0000000000000000 | 0.1431699999999978 | F | F | F |
| 0.5000000000000000 | 0.0000000000000000 | 0.1431699999999978 | F | F | F |
| 0.0000000000000000 | 0.5000000000000000 | 0.1431699999999978 | F | F | F |
| 0.5000000000000000 | 0.5000000000000000 | 0.1431699999999978 | F | F | F |
| 0.2583600000000033 | 0.2583600000000033 | 0.0525599999999997 | F | F | F |
| 0.7416399999999967 | 0.2583600000000033 | 0.0525599999999997 | F | F | F |
| 0.2583600000000033 | 0.7416399999999967 | 0.0525599999999997 | F | F | F |
| 0.7416399999999967 | 0.7416399999999967 | 0.0525599999999997 | F | F | F |
| 0.2611895644625509 | 0.2611895644625509 | 0.2389168160732051 | T | T | T |
| 0.7388104355374492 | 0.2611895644625509 | 0.2389168160732051 | T | T | T |
| 0.2611895644625509 | 0.7388104355374492 | 0.2389168160732051 | T | T | T |
| 0.7388104355374492 | 0.7388104355374492 | 0.2389168160732051 | T | T | T |

**Table S12** Fractional coordinates of the relaxed SrO termination of Sr<sub>8</sub>Fe<sub>7</sub>WO<sub>24</sub> (001) surface.

O W Fe Sr

1.0000000000000000

7.8437999999999999 0.0000000000000000 0.0000000000000000

0.0000000000000005 7.8437999999999999 0.0000000000000000

0.0000000000000013 0.0000000000000013 20.9483999999999995

O W Fe Sr

24 1 7 8

Selective dynamics

Direct

|                     |                     |                    |   |   |   |
|---------------------|---------------------|--------------------|---|---|---|
| -0.0000000000000000 | -0.0000000000000000 | 0.3292481193387159 | T | T | T |
| 0.2444578881122293  | -0.0000000000000000 | 0.2362368879433157 | T | T | T |
| -0.0000000000000000 | 0.2444578881122293  | 0.2362368879433157 | T | T | T |
| 0.5000000000000000  | -0.0000000000000000 | 0.3280333178852223 | T | T | T |
| 0.7555421118877709  | -0.0000000000000000 | 0.2362368879433157 | T | T | T |
| 0.5000000000000000  | 0.2479012556780917  | 0.2342401573474084 | T | T | T |
| -0.0000000000000000 | 0.5000000000000000  | 0.3280333178852223 | T | T | T |
| 0.2479012556780917  | 0.5000000000000000  | 0.2342401573474084 | T | T | T |
| -0.0000000000000000 | 0.7555421118877709  | 0.2362368879433157 | T | T | T |
| 0.5000000000000000  | 0.5000000000000000  | 0.3294323536783088 | T | T | T |
| 0.7520987443219082  | 0.5000000000000000  | 0.2342401573474084 | T | T | T |
| 0.5000000000000000  | 0.7520987443219082  | 0.2342401573474084 | T | T | T |
| 0.0000000000000000  | 0.0000000000000000  | 0.1429600000000022 | F | F | F |
| 0.2535600000000002  | 0.0000000000000000  | 0.0477399999999975 | F | F | F |
| 0.0000000000000000  | 0.2535600000000002  | 0.0477399999999975 | F | F | F |

|                     |                     |                    |   |   |   |
|---------------------|---------------------|--------------------|---|---|---|
| 0.5000000000000000  | 0.0000000000000000  | 0.1400099999999966 | F | F | F |
| 0.7464399999999998  | 0.0000000000000000  | 0.0477399999999975 | F | F | F |
| 0.5000000000000000  | 0.2563999999999993  | 0.0477399999999975 | F | F | F |
| 0.0000000000000000  | 0.5000000000000000  | 0.1400099999999966 | F | F | F |
| 0.2563999999999993  | 0.5000000000000000  | 0.0477399999999975 | F | F | F |
| 0.0000000000000000  | 0.7464399999999998  | 0.0477399999999975 | F | F | F |
| 0.5000000000000000  | 0.5000000000000000  | 0.1389500000000012 | F | F | F |
| 0.7436000000000007  | 0.5000000000000000  | 0.0477399999999975 | F | F | F |
| 0.5000000000000000  | 0.7436000000000007  | 0.0477399999999975 | F | F | F |
| -0.0000000000000000 | -0.0000000000000000 | 0.2359048535266771 | T | T | T |
| 0.5000000000000000  | -0.0000000000000000 | 0.2350950700600649 | T | T | T |
| -0.0000000000000000 | 0.5000000000000000  | 0.2350950700600649 | T | T | T |
| 0.5000000000000000  | 0.5000000000000000  | 0.2339597785522029 | T | T | T |
| 0.0000000000000000  | 0.0000000000000000  | 0.0477399999999975 | F | F | F |
| 0.5000000000000000  | 0.0000000000000000  | 0.0477399999999975 | F | F | F |
| 0.0000000000000000  | 0.5000000000000000  | 0.0477399999999975 | F | F | F |
| 0.5000000000000000  | 0.5000000000000000  | 0.0477399999999975 | F | F | F |
| 0.2602152911654706  | 0.2602152911654706  | 0.3180832660932583 | T | T | T |
| 0.7397847088345295  | 0.2602152911654706  | 0.3180832660932583 | T | T | T |
| 0.2602152911654706  | 0.7397847088345295  | 0.3180832660932583 | T | T | T |
| 0.7397847088345295  | 0.7397847088345295  | 0.3180832660932583 | T | T | T |
| 0.2583600000000033  | 0.2583600000000033  | 0.1382199999999969 | F | F | F |
| 0.7416399999999967  | 0.2583600000000033  | 0.1382199999999969 | F | F | F |
| 0.2583600000000033  | 0.7416399999999967  | 0.1382199999999969 | F | F | F |
| 0.7416399999999967  | 0.7416399999999967  | 0.1382199999999969 | F | F | F |

**Table S13** The calculated imaginary frequency and the fractional coordinates of the optimized transition state for H<sub>2</sub>O adsorption on the FeO<sub>2</sub> termination of Sr<sub>8</sub>Fe<sub>8</sub>O<sub>24</sub> (001) surface.

9 f/i= 24.111730 THz 151.498468 2PiTHz 804.280718 cm-1 99.718136 meV

O Fe Sr O H

1.0000000000000000

7.7625000000000002 0.0000000000000000 0.0000000000000000

0.0000000000000000 7.7625000000000002 0.0000000000000000

0.0000000000000000 0.0000000000000000 20.8218999999999994

O Fe Sr O H

24 8 8 1 2

Selective dynamics

Direct

0.0000000000000000 0.0000000000000000 0.0480299999999971 F F F

0.2586116010541204 0.0008163930732437 0.3279166697682783 F F F

0.0038468508441341 0.2653658573433191 0.3284333165690398 F F F

0.5000000000000000 0.0000000000000000 0.0480299999999971 F F F

0.7305372739594205 0.0030643598920008 0.3350642410912670 F F F

0.4939490748503630 0.2488173365203821 0.3287077665157057 F F F

0.0000000000000000 0.5000000000000000 0.0480299999999971 F F F

0.2456277675153444 0.5024013642377909 0.3298065420807532 F F F

0.0024411662846973 0.7406164802902069 0.3260798272322631 F F F

0.5000000000000000 0.5000000000000000 0.0480299999999971 F F F

0.7537304906630098 0.5012400708258795 0.3285214288034979 F F F

0.4949916759533721 0.7535145685589058 0.3283777870650155 F F F

0.9976820094068088 0.0016758651554625 0.2360046588424467 F F F

0.2500000000000000 0.0000000000000000 0.1412300000000002 F F F

|                    |                    |                    |   |   |   |
|--------------------|--------------------|--------------------|---|---|---|
| 0.0000000000000000 | 0.2500000000000000 | 0.1412300000000002 | F | F | F |
| 0.5041486218152897 | 0.0004581771793681 | 0.2320161622088577 | F | F | F |
| 0.7500000000000000 | 0.0000000000000000 | 0.1412300000000002 | F | F | F |
| 0.5000000000000000 | 0.2500000000000000 | 0.1412300000000002 | F | F | F |
| 0.0006877071846816 | 0.4996706203095727 | 0.2303864412871306 | F | F | F |
| 0.2500000000000000 | 0.5000000000000000 | 0.1412300000000002 | F | F | F |
| 0.0000000000000000 | 0.7500000000000000 | 0.1412300000000002 | F | F | F |
| 0.4993296877489044 | 0.5003267151703099 | 0.2330877560035844 | F | F | F |
| 0.7500000000000000 | 0.5000000000000000 | 0.1412300000000002 | F | F | F |
| 0.5000000000000000 | 0.7500000000000000 | 0.1412300000000002 | F | F | F |
| 0.0172403377898362 | 0.9934596654038685 | 0.3301536825488895 | F | F | F |
| 0.4932194996236348 | 0.0003887258086692 | 0.3258180708103282 | F | F | F |
| 0.9997223211203945 | 0.5005619537546764 | 0.3258838182926027 | F | F | F |
| 0.5006185879632881 | 0.5002314894638005 | 0.3255994032963301 | F | F | F |
| 0.0000000000000000 | 0.0000000000000000 | 0.1412300000000002 | F | F | F |
| 0.5000000000000000 | 0.0000000000000000 | 0.1412300000000002 | F | F | F |
| 0.0000000000000000 | 0.5000000000000000 | 0.1412300000000002 | F | F | F |
| 0.5000000000000000 | 0.5000000000000000 | 0.1412300000000002 | F | F | F |
| 0.2500000000000000 | 0.2500000000000000 | 0.0480299999999971 | F | F | F |
| 0.7500000000000000 | 0.2500000000000000 | 0.0480299999999971 | F | F | F |
| 0.2500000000000000 | 0.7500000000000000 | 0.0480299999999971 | F | F | F |
| 0.7500000000000000 | 0.7500000000000000 | 0.0480299999999971 | F | F | F |
| 0.2487588140823647 | 0.2514658179137115 | 0.2368062837127596 | F | F | F |
| 0.7523570446446399 | 0.2491779218300820 | 0.2390447952829717 | F | F | F |
| 0.2497478398465347 | 0.7483115359822037 | 0.2361503746535050 | F | F | F |
| 0.7518000415688633 | 0.7509136757812911 | 0.2385394427827521 | F | F | F |
| 0.9320602452360163 | 0.0113393062590461 | 0.4199347887262022 | T | T | T |

|                    |                    |                    |   |   |   |
|--------------------|--------------------|--------------------|---|---|---|
| 0.7937481479531812 | 0.0120008256401647 | 0.3858994002166867 | T | T | T |
| 0.9543898558550765 | 0.1294246428155361 | 0.4330914848374490 | T | T | T |

**Table S14** The calculated imaginary frequency and the fractional coordinates of the optimized transition state for H<sub>2</sub>O adsorption on the SrO termination of Sr<sub>8</sub>Fe<sub>8</sub>O<sub>24</sub> (001) surface.

9 f/i= 20.480027 THz 128.679804 2PiTHz 683.140143 cm-1 84.698613 meV

O Fe Sr O H

1.0000000000000000

7.7625000000000002 0.0000000000000000 0.0000000000000000

0.0000000000000000 7.7625000000000002 0.0000000000000000

0.0000000000000000 0.0000000000000000 20.8218999999999994

O Fe Sr O H

24 8 8 1 2

Selective dynamics

Direct

0.9999978182876248 0.9859461635559583 0.3265094322373088 F F F

0.2500993465877599 0.0000243901244730 0.2343292429273518 F F F

0.0000528278259324 0.2532856248758861 0.2390060651706918 F F F

0.5001235160530371 0.0017326212091717 0.3262706983143815 F F F

0.7500263309289181 0.9999625960916916 0.2343078228659721 F F F

0.5001687068482568 0.2488937343534303 0.2328394838841774 F F F

0.9999412311559013 0.5215933853501085 0.3303039329108088 F F F

0.2499520002817022 0.4994895680496256 0.2348586783131168 F F F

0.0001100137424217 0.7474423547971085 0.2323810481532149 F F F

0.5001278398557503 0.4979023428667020 0.3257832396022877 F F F

0.7501657694828481 0.4995645497811552 0.2348242240126268 F F F

0.5000246285697472 0.7506859420295697 0.2343103617291504 F F F

0.0000000000000000 0.0000000000000000 0.1412300000000002 F F F

0.2500000000000000 0.0000000000000000 0.0480299999999971 F F F

|                    |                    |                    |   |   |   |
|--------------------|--------------------|--------------------|---|---|---|
| 0.0000000000000000 | 0.2500000000000000 | 0.0480299999999971 | F | F | F |
| 0.5000000000000000 | 0.0000000000000000 | 0.1412300000000002 | F | F | F |
| 0.7500000000000000 | 0.0000000000000000 | 0.0480299999999971 | F | F | F |
| 0.5000000000000000 | 0.2500000000000000 | 0.0480299999999971 | F | F | F |
| 0.0000000000000000 | 0.5000000000000000 | 0.1412300000000002 | F | F | F |
| 0.2500000000000000 | 0.5000000000000000 | 0.0480299999999971 | F | F | F |
| 0.0000000000000000 | 0.7500000000000000 | 0.0480299999999971 | F | F | F |
| 0.5000000000000000 | 0.5000000000000000 | 0.1412300000000002 | F | F | F |
| 0.7500000000000000 | 0.5000000000000000 | 0.0480299999999971 | F | F | F |
| 0.5000000000000000 | 0.7500000000000000 | 0.0480299999999971 | F | F | F |
| 0.0000531857261450 | 0.9990597861696742 | 0.2357327245263718 | F | F | F |
| 0.5000760376387703 | 0.9994357474611064 | 0.2347714386250175 | F | F | F |
| 0.0000517016585917 | 0.5003581467697487 | 0.2347713337694302 | F | F | F |
| 0.5000731949660846 | 0.5000819659363174 | 0.2349163382366442 | F | F | F |
| 0.0000000000000000 | 0.0000000000000000 | 0.0480299999999971 | F | F | F |
| 0.5000000000000000 | 0.0000000000000000 | 0.0480299999999971 | F | F | F |
| 0.0000000000000000 | 0.5000000000000000 | 0.0480299999999971 | F | F | F |
| 0.5000000000000000 | 0.5000000000000000 | 0.0480299999999971 | F | F | F |
| 0.2610680468819950 | 0.2483880051426226 | 0.3191453308615877 | F | F | F |
| 0.7393886420295246 | 0.2484310801333862 | 0.3191464327564759 | F | F | F |
| 0.2495885412708745 | 0.7503589037212564 | 0.3179340604422762 | F | F | F |
| 0.7504822709085559 | 0.7503699747479828 | 0.3179368400932816 | F | F | F |
| 0.2500000000000000 | 0.2500000000000000 | 0.1412300000000002 | F | F | F |
| 0.7500000000000000 | 0.2500000000000000 | 0.1412300000000002 | F | F | F |
| 0.2500000000000000 | 0.7500000000000000 | 0.1412300000000002 | F | F | F |
| 0.7500000000000000 | 0.7500000000000000 | 0.1412300000000002 | F | F | F |
| 0.0007476737560310 | 0.2763040580896075 | 0.4044275575168399 | T | T | T |



|                    |                    |                    |   |   |   |
|--------------------|--------------------|--------------------|---|---|---|
| 0.0003156933714337 | 0.3960268569182475 | 0.3679628080044068 | T | T | T |
| 0.0003648540427861 | 0.1596554577194524 | 0.3836678269995147 | T | T | T |

**Table S15** The calculated imaginary frequency and the fractional coordinates of the optimized transition state for H<sub>2</sub>O adsorption on the FeO<sub>2</sub> termination of Sr<sub>8</sub>Fe<sub>7</sub>AlO<sub>24</sub> (001) surface.

9 f<sub>i</sub>= 20.580208 THz 129.309260 2PiTHz 686.481823 cm-1 85.112929 meV

O Al Fe Sr O H

1.0000000000000000

7.7388000000000003 0.0000000000000000 0.0000000000000000

0.0000000000000000 7.7388000000000003 0.0000000000000000

0.0000000000000000 0.0000000000000000 20.8100999999999985

O Al Fe Sr O H

24 1 7 8 1 2

Selective dynamics

Direct

0.0000000000000000 0.0000000000000000 0.0488599999999977 F F F

0.2574229325730073 0.0026641016563644 0.3280918319055033 F F F

0.0060799939666225 0.2753761533347969 0.3300455553772821 F F F

0.5000000000000000 0.0000000000000000 0.0489099999999993 F F F

0.7221386402280032 0.0014636123640415 0.3343180582296412 F F F

0.4944325342303060 0.2530993702518600 0.3290991879836014 F F F

0.0000000000000000 0.5000000000000000 0.0489099999999993 F F F

0.2492023407944473 0.5046701220182825 0.3310020514222813 F F F

0.0033943748914496 0.7427387809594777 0.3247518515390269 F F F

0.5000000000000000 0.5000000000000000 0.0481100000000012 F F F

0.7514977483267913 0.5032398316236240 0.3288327575090122 F F F

0.4932476568261848 0.7497801451591073 0.3289587767823008 F F F

0.9960572184040331 0.0050786883517304 0.2395523012947294 F F F

0.2515399999999985 0.0000000000000000 0.1413099999999972 F F F

|                    |                    |                    |   |   |   |
|--------------------|--------------------|--------------------|---|---|---|
| 0.0000000000000000 | 0.2515399999999985 | 0.1413099999999972 | F | F | F |
| 0.5030610732001648 | 0.9999747336334011 | 0.2321800058807497 | F | F | F |
| 0.7484600000000015 | 0.0000000000000000 | 0.1413099999999972 | F | F | F |
| 0.5000000000000000 | 0.2493699999999990 | 0.1413099999999972 | F | F | F |
| 0.0014926646330835 | 0.4988664752434318 | 0.2306766418910513 | F | F | F |
| 0.2493699999999990 | 0.5000000000000000 | 0.1413099999999972 | F | F | F |
| 0.0000000000000000 | 0.7484600000000015 | 0.1413099999999972 | F | F | F |
| 0.4988450158274205 | 0.5008723788462888 | 0.2331287446115198 | F | F | F |
| 0.7506300000000010 | 0.5000000000000000 | 0.1413099999999972 | F | F | F |
| 0.5000000000000000 | 0.7506300000000010 | 0.1413099999999972 | F | F | F |
| 0.0285905545640617 | 0.9767608789339590 | 0.3275877893612957 | F | F | F |
| 0.4894515027121997 | 0.9994872131034569 | 0.3262537094373030 | F | F | F |
| 0.0003692200963670 | 0.5048131816276964 | 0.3260131652699485 | F | F | F |
| 0.5015255554410203 | 0.4996331131252063 | 0.3259291484494042 | F | F | F |
| 0.0000000000000000 | 0.0000000000000000 | 0.1413099999999972 | F | F | F |
| 0.5000000000000000 | 0.0000000000000000 | 0.1413099999999972 | F | F | F |
| 0.0000000000000000 | 0.5000000000000000 | 0.1413099999999972 | F | F | F |
| 0.5000000000000000 | 0.5000000000000000 | 0.1413099999999972 | F | F | F |
| 0.2492299999999972 | 0.2492299999999972 | 0.0480500000000035 | F | F | F |
| 0.7507700000000028 | 0.2492299999999972 | 0.0480500000000035 | F | F | F |
| 0.2492299999999972 | 0.7507700000000028 | 0.0480500000000035 | F | F | F |
| 0.7507700000000028 | 0.7507700000000028 | 0.0480500000000035 | F | F | F |
| 0.2478087387068086 | 0.2504023330441640 | 0.2371948048376780 | F | F | F |
| 0.7538702357664491 | 0.2471889392385691 | 0.2400155323368480 | F | F | F |
| 0.2521504801422054 | 0.7465737049467478 | 0.2346427305563097 | F | F | F |
| 0.7515660465866247 | 0.7522714312275838 | 0.2384809249506503 | F | F | F |
| 0.9451893494266130 | 0.0159313412629061 | 0.4100602801052702 | T | T | T |

|                    |                    |                    |   |   |   |
|--------------------|--------------------|--------------------|---|---|---|
| 0.8045969195567082 | 0.0151883301061915 | 0.3838424139644800 | T | T | T |
| 0.9693826626502187 | 0.1364863983458307 | 0.4202150940976437 | T | T | T |

**Table S16** The calculated imaginary frequency and the fractional coordinates of the optimized transition state for H<sub>2</sub>O adsorption on the SrO termination of Sr<sub>8</sub>Fe<sub>7</sub>AlO<sub>24</sub> (001) surface.

9 f/i= 3.663230 THz 23.016754 2PiTHz 122.192205 cm-1 15.149908 meV

O Al Fe Sr O H

1.0000000000000000

7.7388000000000003 0.0000000000000000 0.0000000000000000

0.0000000000000000 7.7388000000000003 0.0000000000000000

0.0000000000000000 0.0000000000000000 20.8159999999999989

O Al Fe Sr O H

24 1 7 8 1 2

Selective dynamics

Direct

0.0000004076872671 0.9763689582574528 0.3216771451244469 F F F

0.2550712199934466 0.9999733269940378 0.2325321371459026 F F F

0.9999644009418276 0.2517606570954456 0.2393898630317608 F F F

0.4999498057323279 0.0008557668200879 0.3257952996015518 F F F

0.7448863222094957 0.9999747684379443 0.2325411957068013 F F F

0.4999636736390443 0.2528977685688432 0.2329357493379405 F F F

0.0000084256215800 0.5437161522309140 0.3379449688335399 F F F

0.2469117440892461 0.4982878748306021 0.2360819625107808 F F F

0.9999778061729572 0.7459777681451456 0.2335835977744551 F F F

0.4999592985337387 0.4976886127392746 0.3258200582295743 F F F

0.7530402052730096 0.4982948215206378 0.2360869759477282 F F F

0.4999778936687349 0.7457906416792071 0.2337933627150122 F F F

0.0000000000000000 0.0000000000000000 0.1404599999999974 F F F

0.2515399999999985 0.0000000000000000 0.0480400000000003 F F F

|                    |                    |                    |   |   |   |
|--------------------|--------------------|--------------------|---|---|---|
| 0.0000000000000000 | 0.2515399999999985 | 0.0480400000000003 | F | F | F |
| 0.5000000000000000 | 0.0000000000000000 | 0.1404100000000028 | F | F | F |
| 0.7484600000000015 | 0.0000000000000000 | 0.0480400000000003 | F | F | F |
| 0.5000000000000000 | 0.2493699999999990 | 0.0480400000000003 | F | F | F |
| 0.0000000000000000 | 0.5000000000000000 | 0.1404100000000028 | F | F | F |
| 0.2493699999999990 | 0.5000000000000000 | 0.0480400000000003 | F | F | F |
| 0.0000000000000000 | 0.7484600000000015 | 0.0480400000000003 | F | F | F |
| 0.5000000000000000 | 0.5000000000000000 | 0.1412199999999970 | F | F | F |
| 0.7506300000000010 | 0.5000000000000000 | 0.0480400000000003 | F | F | F |
| 0.5000000000000000 | 0.7506300000000010 | 0.0480400000000003 | F | F | F |
| 0.9999751126497642 | 0.0011066098364552 | 0.2320795778041216 | F | F | F |
| 0.4999711993474278 | 0.0009106735720295 | 0.2346928730096280 | F | F | F |
| 0.9999768097038313 | 0.5000662139120209 | 0.2327144902828522 | F | F | F |
| 0.4999712150877897 | 0.4979214380744139 | 0.2368838355458394 | F | F | F |
| 0.0000000000000000 | 0.0000000000000000 | 0.0480400000000003 | F | F | F |
| 0.5000000000000000 | 0.0000000000000000 | 0.0480400000000003 | F | F | F |
| 0.0000000000000000 | 0.5000000000000000 | 0.0480400000000003 | F | F | F |
| 0.5000000000000000 | 0.5000000000000000 | 0.0480400000000003 | F | F | F |
| 0.2477267964231871 | 0.2403799820813006 | 0.3218460865676676 | F | F | F |
| 0.7521228634403343 | 0.2404041446219480 | 0.3218410610721563 | F | F | F |
| 0.2493778916709957 | 0.7548557191102105 | 0.3178688134340817 | F | F | F |
| 0.7505885792022795 | 0.7548666839812199 | 0.3178696166359885 | F | F | F |
| 0.2492299999999972 | 0.2492299999999972 | 0.1412699999999987 | F | F | F |
| 0.7507700000000028 | 0.2492299999999972 | 0.1412699999999987 | F | F | F |
| 0.2492299999999972 | 0.7507700000000028 | 0.1412699999999987 | F | F | F |
| 0.7507700000000028 | 0.7507700000000028 | 0.1412699999999987 | F | F | F |
| 0.9998525338216808 | 0.2571025644659528 | 0.4049185369880632 | T | T | T |

|                    |                    |                    |   |   |   |
|--------------------|--------------------|--------------------|---|---|---|
| 0.9999599670346697 | 0.4482869195581571 | 0.3698349025803935 | T | T | T |
| 0.9998837520245019 | 0.1338517164074702 | 0.4135333559526371 | T | T | T |

**Table S17** The calculated imaginary frequency and the fractional coordinates of the optimized transition state for H<sub>2</sub>O adsorption on the FeO<sub>2</sub> termination of Sr<sub>8</sub>Fe<sub>7</sub>ZrO<sub>24</sub> (001) surface.

9 f/i= 26.095925 THz 163.965533 2PiTHz 870.466335 cm-1 107.924110 meV

O Zr Fe Sr O H

1.0000000000000000

7.8491000000000000 0.0000000000000000 0.0000000000000000

0.0000000000000000 7.8491000000000000 0.0000000000000000

0.0000000000000000 0.0000000000000000 20.8737999999999992

O Zr Fe Sr O H

24 1 7 8 1 2

Selective dynamics

Direct

0.0000000000000000 0.0000000000000000 0.0523299999999978 F F F

0.2662550591089925 0.0022498456273112 0.3346188225063216 F F F

0.0023360362470868 0.2686800750356895 0.3298284024237077 F F F

0.5000000000000000 0.0000000000000000 0.0487299999999991 F F F

0.7281431386405544 0.0053651574595577 0.3425151893680791 F F F

0.4987062448599247 0.2677260268008865 0.3263631449360460 F F F

0.0000000000000000 0.5000000000000000 0.0487299999999991 F F F

0.2492690218976890 0.5025254763156468 0.3249828494088476 F F F

0.0004251896838028 0.7330486011499033 0.3301682757553408 F F F

0.5000000000000000 0.5000000000000000 0.0479100000000017 F F F

0.7501856042446562 0.5010710239092333 0.3250434781893290 F F F

0.4998692051816462 0.7402929645585985 0.3245937273872457 F F F

0.9930229301394391 0.0002857126133904 0.2373525427304060 F F F

0.2538600000000031 0.0000000000000000 0.1412899999999979 F F F



|                    |                    |                    |   |   |   |
|--------------------|--------------------|--------------------|---|---|---|
| 0.0000000000000000 | 0.2538600000000031 | 0.1412899999999979 | F | F | F |
| 0.5053400993748909 | 0.0022467844125416 | 0.2335841162428878 | F | F | F |
| 0.7461399999999969 | 0.0000000000000000 | 0.1412899999999979 | F | F | F |
| 0.5000000000000000 | 0.2516600000000011 | 0.1412899999999979 | F | F | F |
| 0.0001967747480194 | 0.5007888523775037 | 0.2309309166700260 | F | F | F |
| 0.2516600000000011 | 0.5000000000000000 | 0.1412899999999979 | F | F | F |
| 0.0000000000000000 | 0.7461399999999969 | 0.1412899999999979 | F | F | F |
| 0.4994548913537500 | 0.5006835007424399 | 0.2307065248577160 | F | F | F |
| 0.7483399999999989 | 0.5000000000000000 | 0.1412899999999979 | F | F | F |
| 0.5000000000000000 | 0.7483399999999989 | 0.1412899999999979 | F | F | F |
| 0.0098467817177266 | 0.9994451383217111 | 0.3384369068042403 | F | F | F |
| 0.4965384584615009 | 0.9874212699072800 | 0.3244125755354617 | F | F | F |
| 0.0026089795684356 | 0.5004467635762140 | 0.3242022030231411 | F | F | F |
| 0.5021732873569960 | 0.4984306571180923 | 0.3235411009718803 | F | F | F |
| 0.0000000000000000 | 0.0000000000000000 | 0.1412899999999979 | F | F | F |
| 0.5000000000000000 | 0.0000000000000000 | 0.1412899999999979 | F | F | F |
| 0.0000000000000000 | 0.5000000000000000 | 0.1412899999999979 | F | F | F |
| 0.5000000000000000 | 0.5000000000000000 | 0.1412899999999979 | F | F | F |
| 0.2566199999999981 | 0.2566199999999981 | 0.0497700000000023 | F | F | F |
| 0.7433899999999980 | 0.2566199999999981 | 0.0497700000000023 | F | F | F |
| 0.2566199999999981 | 0.7433899999999980 | 0.0497700000000023 | F | F | F |
| 0.7433899999999980 | 0.7433899999999980 | 0.0497700000000023 | F | F | F |
| 0.2533996655797424 | 0.2539939131526197 | 0.2360502040294463 | F | F | F |
| 0.7492783406563035 | 0.2526996676286828 | 0.2365621276780558 | F | F | F |
| 0.2514962017842493 | 0.7437811004831616 | 0.2348290161916040 | F | F | F |
| 0.7507111175470840 | 0.7446388591103812 | 0.2352446234574614 | F | F | F |
| 0.8988986070254867 | 0.0157917370111917 | 0.4356707663728940 | T | T | T |

|                    |                    |                    |   |   |   |
|--------------------|--------------------|--------------------|---|---|---|
| 0.7743981322043325 | 0.0177530388451075 | 0.3973324560129683 | T | T | T |
| 0.9050437204294043 | 0.1200188439495875 | 0.4599504320796224 | T | T | T |

**Table S18** The calculated imaginary frequency and the fractional coordinates of the optimized transition state for H<sub>2</sub>O adsorption on the SrO termination of Sr<sub>8</sub>Fe<sub>7</sub>ZrO<sub>24</sub> (001) surface.

9 f/i= 6.216789 THz 39.061235 2PiTHz 207.369743 cm-1 25.710581 meV

O Zr Fe Sr O H

1.0000000000000000

7.8491000000000000 0.0000000000000000 0.0000000000000000

0.0000000000000000 7.8491000000000000 0.0000000000000000

0.0000000000000000 0.0000000000000000 20.9923000000000002

O Zr Fe Sr O H

24 1 7 8 1 2

Selective dynamics

Direct

0.9998029193515805 0.9608711822785310 0.3325864379138110 F F F

0.2644116732189232 0.0126749761192215 0.2343527219197057 F F F

0.9904648376792906 0.2655507248503426 0.2449633278463637 F F F

0.5002383501463186 0.0051078056805309 0.3252657362582809 F F F

0.7351518449281826 0.9931604137269829 0.2338655839172148 F F F

0.5094924767984708 0.2630418941207822 0.2330733994779948 F F F

0.9980402456744812 0.5562413195743332 0.3385742112924177 F F F

0.2377532278151335 0.4892437022733631 0.2370935443682001 F F F

0.0118513605005504 0.7367209073612315 0.2294032767145850 F F F

0.5002802243173505 0.4982804855672001 0.3272392593072411 F F F

0.7621433520575351 0.5102157177399604 0.2361905460792570 F F F

0.4910779785438493 0.7385799391564873 0.2344867375101245 F F F

0.0000000000000000 0.0000000000000000 0.1360900000000029 F F F

0.2538600000000031 0.0000000000000000 0.0476400000000012 F F F

|                    |                    |                    |   |   |   |
|--------------------|--------------------|--------------------|---|---|---|
| 0.0000000000000000 | 0.2538600000000031 | 0.0476400000000012 | F | F | F |
| 0.4999999999999929 | 0.0000000000000000 | 0.1396700000000024 | F | F | F |
| 0.7461399999999898 | 0.0000000000000000 | 0.0476400000000012 | F | F | F |
| 0.4999999999999929 | 0.2516600000000011 | 0.0476400000000012 | F | F | F |
| 0.0000000000000000 | 0.4999999999999929 | 0.1396700000000024 | F | F | F |
| 0.2516600000000011 | 0.4999999999999929 | 0.0476400000000012 | F | F | F |
| 0.0000000000000000 | 0.7461399999999898 | 0.0476400000000012 | F | F | F |
| 0.4999999999999929 | 0.4999999999999929 | 0.1404899999999998 | F | F | F |
| 0.7483399999999918 | 0.4999999999999929 | 0.0476400000000012 | F | F | F |
| 0.4999999999999929 | 0.7483399999999918 | 0.0476400000000012 | F | F | F |
| 0.9996208187781122 | 0.0006321186632832 | 0.2368029150396254 | F | F | F |
| 0.4998304589907434 | 0.0040519947483517 | 0.2351679105164806 | F | F | F |
| 0.9999134529276148 | 0.5027849318437916 | 0.2329628077891712 | F | F | F |
| 0.4998491608084734 | 0.4999870633779011 | 0.2362431810588461 | F | F | F |
| 0.0000000000000000 | 0.0000000000000000 | 0.0476400000000012 | F | F | F |
| 0.4999999999999929 | 0.0000000000000000 | 0.0476400000000012 | F | F | F |
| 0.0000000000000000 | 0.4999999999999929 | 0.0476400000000012 | F | F | F |
| 0.4999999999999929 | 0.4999999999999929 | 0.0476400000000012 | F | F | F |
| 0.2544838767559128 | 0.2547997690139567 | 0.3249085404453709 | F | F | F |
| 0.7435841036144382 | 0.2580215969223687 | 0.3252719057545619 | F | F | F |
| 0.2531440878910018 | 0.7476280126018082 | 0.3202258679170384 | F | F | F |
| 0.7433679700862115 | 0.7500663594208916 | 0.3207095593398677 | F | F | F |
| 0.2566199999999981 | 0.2566199999999981 | 0.1386400000000023 | F | F | F |
| 0.7433899999999980 | 0.2566199999999981 | 0.1386400000000023 | F | F | F |
| 0.2566199999999981 | 0.7433899999999980 | 0.1386400000000023 | F | F | F |
| 0.7433899999999980 | 0.7433899999999980 | 0.1386400000000023 | F | F | F |
| 0.0008369020004650 | 0.2767863765091931 | 0.4021246155832401 | T | T | T |

|                    |                    |                    |   |   |   |
|--------------------|--------------------|--------------------|---|---|---|
| 0.9991872939931739 | 0.4622071147424265 | 0.3704162840201306 | T | T | T |
| 0.9997919939622192 | 0.1614433988049413 | 0.4183726109584053 | T | T | T |

**Table S19** The calculated imaginary frequency and the fractional coordinates of the optimized transition state for H<sub>2</sub>O adsorption on the FeO<sub>2</sub> termination of Sr<sub>8</sub>Fe<sub>7</sub>NbO<sub>24</sub> (001) surface.

9 f/i= 27.610757 THz 173.483500 2PiTHz 920.995676 cm-1 114.188952 meV

O Nb Fe Sr O H

1.0000000000000000

7.8395000000000001 0.0000000000000000 0.0000000000000000

0.0000000000000000 7.8395000000000001 0.0000000000000000

0.0000000000000000 0.0000000000000000 20.8621000000000016

O Nb Fe Sr O H

24 1 7 8 1 2

Selective dynamics

Direct

0.0000000000000000 0.0000000000000000 0.0485200000000034 F F F

0.2590924240049333 0.0021402336154992 0.3396013418100381 F F F

0.0044721507782484 0.2563240993790359 0.3316118647752191 F F F

0.5000000000000000 0.0000000000000000 0.0489400000000018 F F F

0.7354397376931061 0.0056850444267553 0.3401909413021400 F F F

0.4968470154810589 0.2653349574266244 0.3266448980457710 F F F

0.0000000000000000 0.5000000000000000 0.0489400000000018 F F F

0.2607832510143879 0.5026028525051842 0.3264441929954529 F F F

0.0015056802023992 0.7470266885598349 0.3330592893729332 F F F

0.5000000000000000 0.5000000000000000 0.0479300000000009 F F F

0.7403314781059080 0.5005326764951477 0.3262960617273762 F F F

0.4988487255394602 0.7405102983922234 0.3250148770721921 F F F

0.9959392721879752 0.0006564001618159 0.2408165836540590 F F F

0.2549300000000017 0.0000000000000000 0.1410399999999967 F F F

|                    |                    |                    |   |   |   |
|--------------------|--------------------|--------------------|---|---|---|
| 0.0000000000000000 | 0.254930000000017  | 0.141039999999967  | F | F | F |
| 0.4992163788718358 | 0.0016619999722494 | 0.2340563077677942 | F | F | F |
| 0.745069999999983  | 0.0000000000000000 | 0.141039999999967  | F | F | F |
| 0.5000000000000000 | 0.2522400000000005 | 0.141039999999967  | F | F | F |
| 0.0009164515651392 | 0.5022317872465223 | 0.2328770422009399 | F | F | F |
| 0.2522400000000005 | 0.5000000000000000 | 0.141039999999967  | F | F | F |
| 0.0000000000000000 | 0.745069999999983  | 0.141039999999967  | F | F | F |
| 0.4999091757523928 | 0.5002484215062921 | 0.2292454887903048 | F | F | F |
| 0.747759999999995  | 0.5000000000000000 | 0.141039999999967  | F | F | F |
| 0.5000000000000000 | 0.747759999999995  | 0.141039999999967  | F | F | F |
| 0.0185546049705039 | 0.9974196044613564 | 0.3344145854062077 | F | F | F |
| 0.5004793700494190 | 0.9920200002560264 | 0.3248968776719749 | F | F | F |
| 0.0008118426191572 | 0.4990236481752959 | 0.3249770136667394 | F | F | F |
| 0.5006475856108850 | 0.4995319529924416 | 0.3252584324963834 | F | F | F |
| 0.0000000000000000 | 0.0000000000000000 | 0.141039999999967  | F | F | F |
| 0.5000000000000000 | 0.0000000000000000 | 0.141039999999967  | F | F | F |
| 0.0000000000000000 | 0.5000000000000000 | 0.141039999999967  | F | F | F |
| 0.5000000000000000 | 0.5000000000000000 | 0.141039999999967  | F | F | F |
| 0.256199999999998  | 0.256199999999998  | 0.049419999999978  | F | F | F |
| 0.7438000000000002 | 0.256199999999998  | 0.049419999999978  | F | F | F |
| 0.256199999999998  | 0.7438000000000002 | 0.049419999999978  | F | F | F |
| 0.7438000000000002 | 0.7438000000000002 | 0.049419999999978  | F | F | F |
| 0.2564472998438845 | 0.2583482545772711 | 0.2352383947856822 | F | F | F |
| 0.7474357221414039 | 0.2537832171540941 | 0.2378712497245985 | F | F | F |
| 0.2567659381186616 | 0.7400790578330927 | 0.2339421704551015 | F | F | F |
| 0.7481128502776642 | 0.7435969877269386 | 0.2365039334445669 | F | F | F |
| 0.9128653008566161 | 0.0155397834719651 | 0.4311307406124811 | T | T | T |

|                    |                    |                    |   |   |   |
|--------------------|--------------------|--------------------|---|---|---|
| 0.7889781070504753 | 0.0175847827362929 | 0.3961528608803135 | T | T | T |
| 0.9288273765909238 | 0.1281716406202520 | 0.4491831283807901 | T | T | T |



**Table S20** The calculated imaginary frequency and the fractional coordinates of the optimized transition state for H<sub>2</sub>O adsorption on the SrO termination of Sr<sub>8</sub>Fe<sub>7</sub>NbO<sub>24</sub> (001) surface.

9 f/i= 6.281600 THz 39.468460 2PiTHz 209.531632 cm-1 25.978621 meV

O Nb Fe Sr O H

|                    |                    |                     |
|--------------------|--------------------|---------------------|
| 1.0000000000000000 |                    |                     |
| 7.8395000000000001 | 0.0000000000000000 | 0.0000000000000000  |
| 0.0000000000000000 | 7.8395000000000001 | 0.0000000000000000  |
| 0.0000000000000000 | 0.0000000000000000 | 20.9283000000000001 |

|    |    |    |    |   |   |
|----|----|----|----|---|---|
| O  | Nb | Fe | Sr | O | H |
| 24 | 1  | 7  | 8  | 1 | 2 |

Selective dynamics

Direct

|                    |                    |                    |   |   |   |
|--------------------|--------------------|--------------------|---|---|---|
| 0.0000132559696908 | 0.9775936402287400 | 0.3323730577060999 | F | F | F |
| 0.2531553605814807 | 0.9998481471301091 | 0.2356240571966310 | F | F | F |
| 0.0000132884438386 | 0.2524703056503412 | 0.2422998083521648 | F | F | F |
| 0.4999927024810020 | 0.0037777554049043 | 0.3274467286401759 | F | F | F |
| 0.7468419337703196 | 0.9998823305412188 | 0.2356285491294656 | F | F | F |
| 0.4999766844309974 | 0.2525422669962865 | 0.2332834628028806 | F | F | F |
| 0.0000166714983010 | 0.5233303752914793 | 0.3302188034480125 | F | F | F |
| 0.2528801614011726 | 0.4983730802508362 | 0.2353409320791400 | F | F | F |
| 0.9999769374959087 | 0.7465588893679325 | 0.2322883972735639 | F | F | F |
| 0.4999906805649346 | 0.4972540230060076 | 0.3285956415971896 | F | F | F |
| 0.7471160712323694 | 0.4983407971902452 | 0.2353441660477600 | F | F | F |
| 0.5000156709544115 | 0.7465053552238530 | 0.2352777587511454 | F | F | F |
| 0.0000000000000000 | 0.0000000000000000 | 0.1400099999999966 | F | F | F |
| 0.2549300000000017 | 0.0000000000000000 | 0.0477800000000030 | F | F | F |

|                    |                    |                    |   |   |   |
|--------------------|--------------------|--------------------|---|---|---|
| 0.0000000000000000 | 0.254930000000017  | 0.047780000000030  | F | F | F |
| 0.5000000000000000 | 0.0000000000000000 | 0.139580000000023  | F | F | F |
| 0.745069999999983  | 0.0000000000000000 | 0.047780000000030  | F | F | F |
| 0.5000000000000000 | 0.252240000000005  | 0.047780000000030  | F | F | F |
| 0.0000000000000000 | 0.5000000000000000 | 0.139580000000023  | F | F | F |
| 0.252240000000005  | 0.5000000000000000 | 0.047780000000030  | F | F | F |
| 0.0000000000000000 | 0.745069999999983  | 0.047780000000030  | F | F | F |
| 0.5000000000000000 | 0.5000000000000000 | 0.140590000000031  | F | F | F |
| 0.747759999999995  | 0.5000000000000000 | 0.047780000000030  | F | F | F |
| 0.5000000000000000 | 0.747759999999995  | 0.047780000000030  | F | F | F |
| 0.999999055130644  | 0.9992134161083612 | 0.2371445356803221 | F | F | F |
| 0.4999968356748425 | 0.9988376687649776 | 0.2354083756345275 | F | F | F |
| 0.9999984630725507 | 0.5004564317758238 | 0.2353797737174332 | F | F | F |
| 0.4999963647739847 | 0.4998856243565371 | 0.2349946004217145 | F | F | F |
| 0.0000000000000000 | 0.0000000000000000 | 0.047780000000030  | F | F | F |
| 0.5000000000000000 | 0.0000000000000000 | 0.047780000000030  | F | F | F |
| 0.0000000000000000 | 0.5000000000000000 | 0.047780000000030  | F | F | F |
| 0.5000000000000000 | 0.5000000000000000 | 0.047780000000030  | F | F | F |
| 0.2700898280841670 | 0.2553448267005933 | 0.3209258639778980 | F | F | F |
| 0.7298646971523297 | 0.2553273111813326 | 0.3209252431455809 | F | F | F |
| 0.2551403793120386 | 0.7411436025013955 | 0.3200925973294275 | F | F | F |
| 0.7448728574702983 | 0.7411373212281518 | 0.3200913247170050 | F | F | F |
| 0.256199999999998  | 0.256199999999998  | 0.139110000000023  | F | F | F |
| 0.7438000000000002 | 0.256199999999998  | 0.139110000000023  | F | F | F |
| 0.256199999999998  | 0.7438000000000002 | 0.139110000000023  | F | F | F |
| 0.7438000000000002 | 0.7438000000000002 | 0.139110000000023  | F | F | F |
| 0.9999347618268359 | 0.2740162169083220 | 0.4026999112550627 | T | T | T |

|                    |                    |                    |   |   |   |
|--------------------|--------------------|--------------------|---|---|---|
| 0.9999715555669084 | 0.3870387613609054 | 0.3692235524876750 | T | T | T |
| 0.9999697919599555 | 0.1584332740955361 | 0.3813700084452451 | T | T | T |

**Table S21** The calculated imaginary frequency and the fractional coordinates of the optimized transition state for H<sub>2</sub>O adsorption on the FeO<sub>2</sub> termination of Sr<sub>8</sub>Fe<sub>7</sub>WO<sub>24</sub> (001) surface.

9 f/i= 10.437139 THz 65.578481 2PiTHz 348.145485 cm-1 43.164554 meV

O W Fe Sr O H

1.0000000000000000

7.8437999999999999 0.0000000000000000 0.0000000000000000

0.0000000000000000 7.8437999999999999 0.0000000000000000

0.0000000000000000 0.0000000000000000 20.9165999999999990

O W Fe Sr O H

24 1 7 8 1 2

Selective dynamics

Direct

0.0000000000000000 0.0000000000000000 0.0478099999999984 F F F

0.2469532072725897 0.0071888928610875 0.3440440076360858 F F F

0.9945138223695551 0.2432728149445893 0.3362432733448841 F F F

0.5000000000000000 0.0000000000000000 0.0507599999999968 F F F

0.7433350450309248 0.9977159270044638 0.3299717014024210 F F F

0.4975714605267569 0.2674041548164752 0.3267950882136716 F F F

0.0000000000000000 0.5000000000000000 0.0507599999999968 F F F

0.2513930777418452 0.4998540543017143 0.3278594223440976 F F F

0.0013672258403403 0.7600415772030118 0.3356013121765855 F F F

0.5000000000000000 0.5000000000000000 0.0518199999999993 F F F

0.7384572719394242 0.5061904949375773 0.3277466040426020 F F F

0.4879461857676191 0.7403143809307480 0.3285774940557715 F F F

0.0083674751169553 0.0027308093178036 0.2432497776584199 F F F

0.2535600000000002 0.0000000000000000 0.1431699999999978 F F F

|                    |                    |                    |   |   |   |
|--------------------|--------------------|--------------------|---|---|---|
| 0.0000000000000000 | 0.2535600000000002 | 0.1431699999999978 | F | F | F |
| 0.4874154889498783 | 0.9998489221476419 | 0.2353185206377262 | F | F | F |
| 0.7464400000000069 | 0.0000000000000000 | 0.1431699999999978 | F | F | F |
| 0.5000000000000000 | 0.2563999999999993 | 0.1431699999999978 | F | F | F |
| 0.9981221941718204 | 0.5008526636540580 | 0.2353813414234693 | F | F | F |
| 0.2563999999999993 | 0.5000000000000000 | 0.1431699999999978 | F | F | F |
| 0.0000000000000000 | 0.7464400000000069 | 0.1431699999999978 | F | F | F |
| 0.4972698875739425 | 0.5041090327391728 | 0.2308892816446004 | F | F | F |
| 0.7436000000000007 | 0.5000000000000000 | 0.1431699999999978 | F | F | F |
| 0.5000000000000000 | 0.7436000000000007 | 0.1431699999999978 | F | F | F |
| 0.0145544085035922 | 0.0000032900813167 | 0.3323309603071962 | F | F | F |
| 0.4994974337399043 | 0.9795808667951249 | 0.3254147328681967 | F | F | F |
| 0.0096249135718054 | 0.4989331652282232 | 0.3270895702085213 | F | F | F |
| 0.5030085504372579 | 0.4956439312302336 | 0.3271811447522808 | F | F | F |
| 0.0000000000000000 | 0.0000000000000000 | 0.1431699999999978 | F | F | F |
| 0.5000000000000000 | 0.0000000000000000 | 0.1431699999999978 | F | F | F |
| 0.0000000000000000 | 0.5000000000000000 | 0.1431699999999978 | F | F | F |
| 0.5000000000000000 | 0.5000000000000000 | 0.1431699999999978 | F | F | F |
| 0.2583600000000033 | 0.2583600000000033 | 0.0525599999999997 | F | F | F |
| 0.7416400000000039 | 0.2583600000000033 | 0.0525599999999997 | F | F | F |
| 0.2583600000000033 | 0.7416400000000039 | 0.0525599999999997 | F | F | F |
| 0.7416400000000039 | 0.7416400000000039 | 0.0525599999999997 | F | F | F |
| 0.2618798046002553 | 0.2612239482435825 | 0.2370922178901793 | F | F | F |
| 0.7421152771338555 | 0.2571875392266421 | 0.2415113206156505 | F | F | F |
| 0.2586207135568230 | 0.7353115163144253 | 0.2351959946590370 | F | F | F |
| 0.7439582855488709 | 0.7385484369607340 | 0.2390377313391099 | F | F | F |
| 0.8967287854575900 | 0.0025445759470983 | 0.4275638970654114 | T | T | T |

|                    |                    |                    |   |   |   |
|--------------------|--------------------|--------------------|---|---|---|
| 0.7861890234978972 | 0.0000638672686648 | 0.3939739082776512 | T | T | T |
| 0.8999632943355423 | 0.1180569356152432 | 0.4441550403604034 | T | T | T |

**Table S22** The calculated imaginary frequency and the fractional coordinates of the optimized transition state for H<sub>2</sub>O adsorption on the SrO termination of Sr<sub>8</sub>Fe<sub>7</sub>WO<sub>24</sub> (001) surface.

9 f/i= 3.416740 THz 21.468010 2PiTHz 113.970172 cm-1 14.130506 meV

O W Fe Sr O H

1.0000000000000000

7.8437999999999999 0.0000000000000000 0.0000000000000000

0.0000000000000000 7.8437999999999999 0.0000000000000000

0.0000000000000000 0.0000000000000000 20.9483999999999995

O W Fe Sr O H

24 1 7 8 1 2

Selective dynamics

Direct

0.9994063793660715 0.9772112874996566 0.3287807613804574 F F F

0.2436048417153316 0.0004228470635113 0.2359545827299172 F F F

0.9991767577283071 0.2423474801117251 0.2422291231506151 F F F

0.5004346887379896 0.0034259105287049 0.3267733132331756 F F F

0.7565170835599346 0.9983712882920557 0.2356979850999537 F F F

0.5010590014543013 0.2458825780677358 0.2325178506946699 F F F

0.9993321947097016 0.5196576867410698 0.3295673089747808 F F F

0.2502986136272440 0.4968378833671068 0.2345015825552963 F F F

0.0013013490234215 0.7535394418582442 0.2326227286002975 F F F

0.5003101262151262 0.4974910805714003 0.3284030253251018 F F F

0.7498115375212606 0.4984068719854946 0.2342908950591109 F F F

0.4992395483518450 0.7524461662345630 0.2343574937479005 F F F

0.0000000000000000 0.0000000000000000 0.1429600000000022 F F F

0.2535600000000002 0.0000000000000000 0.0477399999999975 F F F

|                    |                    |                    |   |   |   |
|--------------------|--------------------|--------------------|---|---|---|
| 0.0000000000000000 | 0.2535600000000002 | 0.0477399999999975 | F | F | F |
| 0.5000000000000000 | 0.0000000000000000 | 0.1400099999999966 | F | F | F |
| 0.7464400000000069 | 0.0000000000000000 | 0.0477399999999975 | F | F | F |
| 0.5000000000000000 | 0.2563999999999993 | 0.0477399999999975 | F | F | F |
| 0.0000000000000000 | 0.5000000000000000 | 0.1400099999999966 | F | F | F |
| 0.2563999999999993 | 0.5000000000000000 | 0.0477399999999975 | F | F | F |
| 0.0000000000000000 | 0.7464400000000069 | 0.0477399999999975 | F | F | F |
| 0.5000000000000000 | 0.5000000000000000 | 0.1389500000000012 | F | F | F |
| 0.7436000000000007 | 0.5000000000000000 | 0.0477399999999975 | F | F | F |
| 0.5000000000000000 | 0.7436000000000007 | 0.0477399999999975 | F | F | F |
| 0.0000566457580149 | 0.9975886671676335 | 0.2358332665394940 | F | F | F |
| 0.5001402666856620 | 0.9988733650866095 | 0.2343891764315416 | F | F | F |
| 0.0000200619982209 | 0.4989009996484981 | 0.2344970272929388 | F | F | F |
| 0.5001063498665843 | 0.4997670324161305 | 0.2338022247962854 | F | F | F |
| 0.0000000000000000 | 0.0000000000000000 | 0.0477399999999975 | F | F | F |
| 0.5000000000000000 | 0.0000000000000000 | 0.0477399999999975 | F | F | F |
| 0.0000000000000000 | 0.5000000000000000 | 0.0477399999999975 | F | F | F |
| 0.5000000000000000 | 0.5000000000000000 | 0.0477399999999975 | F | F | F |
| 0.2729947436503934 | 0.2561616007018870 | 0.3201932696243972 | F | F | F |
| 0.7286637919628944 | 0.2567249949109396 | 0.3201038162438152 | F | F | F |
| 0.2574222327775857 | 0.7378448148285344 | 0.3191346184920434 | F | F | F |
| 0.7422703106567425 | 0.7383693746643445 | 0.3191847239101619 | F | F | F |
| 0.2583600000000033 | 0.2583600000000033 | 0.1382199999999969 | F | F | F |
| 0.7416400000000039 | 0.2583600000000033 | 0.1382199999999969 | F | F | F |
| 0.2583600000000033 | 0.7416400000000039 | 0.1382199999999969 | F | F | F |
| 0.7416400000000039 | 0.7416400000000039 | 0.1382199999999969 | F | F | F |
| 0.0030714256150333 | 0.2675127984480383 | 0.4015820186997843 | T | T | T |



|                    |                    |                    |   |   |   |
|--------------------|--------------------|--------------------|---|---|---|
| 0.0011127098004948 | 0.3804864326493700 | 0.3692117138889870 | T | T | T |
| 0.0011510168849185 | 0.1538490202693268 | 0.3790648457160924 | T | T | T |
